# Supplementary material for: Design, synthesis and biological evaluation of sugar-derived esters, α-ketoesters and α-ketoamides as inhibitors for Mycobacterium tuberculosis antigen85C
Source: Royal Society of Chemistry journal article supplement (doi:10.1039/b902284h), 2009-06-19

## Supporting Information

### Design, Synthesis and Biological Evaluation of Sugar-Derived Esters, $\alpha$ -Ketoesters and $\alpha$ -Ketoamides as Inhibitors for *Mycobacterium tuberculosis* Antigen 85C

Aditya K. Sanki, Julie Boucau, Francis E. Umesiri, Donald R. Ronning and

Steven J. Sucheck\*

*The University of Toledo, Department of Chemistry, 2801 W. Bancroft Street, Toledo, OH, USA.*

\*E-mail: [Steve.Sucheck@UTNet.UToledo.Edu](mailto:Steve.Sucheck@UTNet.UToledo.Edu)

### Supporting Information Contents

- Page S-1: Title of the paper, author's names, address, and table of contents
- Page S-2: Table of contents continued
- Page S-3:  $^1\text{H}$  NMR of methyl 2,3-di-*O*-benzyl-5-*O*-trityl- $\beta$ -D-arabinofuranoside (**8**)
- Page S-4:  $^{13}\text{C}$  NMR of methyl 2,3-di-*O*-benzyl-5-*O*-trityl- $\beta$ -D-arabinofuranoside (**8**)
- Page S-5:  $^1\text{H}$  NMR of methyl (5*E*)-2,3-di-*O*-benzyl-5,6-dideoxy- $\beta$ -D-arabino-hept-5-enofuranosiduronic acid methyl ester (**10**)
- Page S-6:  $^{13}\text{C}$  NMR of methyl (5*E*)-2,3-di-*O*-benzyl-5,6-dideoxy- $\beta$ -D-arabino-hept-5-enofuranosiduronic acid methyl ester (**10**)
- Page S-7:  $^1\text{H}$  NMR of methyl  $\beta$ -D-arabino-heptafuranosiduronic acid methyl ester (**1**)
- Page S-8:  $^{13}\text{C}$  NMR of methyl  $\beta$ -D-arabino-heptafuranosiduronic acid methyl ester (**1**)
- Page S-9:  $^1\text{H}$  NMR of methyl 2,3-di-*O*-benzyl- $\beta$ -D-arabino-heptafuranosiduronic acid methyl ester (**11**)
- Page S-10:  $^{13}\text{C}$  NMR of methyl 2,3-di-*O*-benzyl- $\beta$ -D-arabino-heptafuranosiduronic acid methyl ester (**11**)
- Page S-11:  $^1\text{H}$  NMR of methyl 2,3-di-*O*-benzyl- $\beta$ -D-arabino-heptafuranosiduronic acid (**12**)
- Page S-12:  $^{13}\text{C}$  NMR of methyl 2,3-di-*O*-benzyl- $\beta$ -D-arabino-heptafuranosiduronic acid (**12**)
- Page S-13:  $^1\text{H}$  NMR of methyl 2,3-di-*O*-benzyl-7-keto- $\beta$ -D-arabino-nonafuranosiduronitrile (**13**)
- Page S-14:  $^{13}\text{C}$  NMR of methyl 2,3-di-*O*-benzyl-7-keto- $\beta$ -D-arabino-nonafuranosiduronitrile (**13**)
- Page S-15:  $^{31}\text{P}$  NMR of methyl 2,3-di-*O*-benzyl-7-keto- $\beta$ -D-arabino-nonafuranosiduronitrile (**13**)
- Page S-16:  $^1\text{H}$  NMR of methyl 2,3-di-*O*-benzyl-7-keto- $\beta$ -D-arabino-octafuranosiduronic acid methyl ester (**14**)
- Page S-17:  $^{13}\text{C}$  NMR of methyl 2,3-di-*O*-benzyl-7-keto- $\beta$ -D-arabino-octafuranosiduronic acid methyl ester (**14**)
- Page S-18:  $^1\text{H}$  NMR of methyl 7-keto- $\beta$ -D-arabino-octafuranosiduronic acid methyl ester (**2**)
- Page S-19:  $^{13}\text{C}$  NMR of methyl 7-keto- $\beta$ -D-arabino-octafuranosiduronic acid methyl ester (**2**)
- Page S-20:  $^1\text{H}$  NMR of methyl *N*-butyl-2,3-di-*O*-benzyl-7-keto- $\beta$ -D-arabino-octafuranosiduronamide (**15**)
- Page S-21:  $^{13}\text{C}$  NMR of methyl *N*-butyl-2,3-di-*O*-benzyl-7-keto- $\beta$ -D-arabino-octafuranosiduronamide (**15**)
- Page S-22:  $^1\text{H}$  NMR of methyl *N*-butyl-7-keto- $\beta$ -D-arabino-octafuranosiduronamide (**3**)
- Page S-23:  $^{13}\text{C}$  NMR of methyl *N*-butyl-7-keto- $\beta$ -D-arabino-octafuranosiduronamide (**3**)
- Page S-24:  $^1\text{H}$  NMR of 6, 6'-di-*O*-*tert*-butyldiphenylsilyl- $\alpha$ -D-trehalose (**18**)
- Page S-25:  $^{13}\text{C}$  NMR of 6, 6'-di-*O*-*tert*-butyldiphenylsilyl- $\alpha$ -D-trehalose (**18**)
- Page S-26:  $^1\text{H}$  NMR of 2,2',3,3',4,4',6'-hepta-*O*-benzyl-6,6'-di-*O*-*tert*-butyldiphenylsilyl- $\alpha$ -D-trehalose (**20**)

- Page S-27:  $^{13}\text{C}$  NMR of 2,2',3,3',4,4',6'-hepta-*O*-benzyl-6,6'-di-*O*-*tert*-butyldiphenylsilyl- $\alpha$ -D-trehalose (**20**)
- Page S-28:  $^1\text{H}$  NMR of 2,2',3,3',4,4'-hexa-*O*-benzyl-6,6'-di-*O*-*tert*-butyldiphenylsilyl- $\alpha$ -D-trehalose (**21**)
- Page S-29:  $^{13}\text{C}$  NMR of 2,2',3,3',4,4'-hexa-*O*-benzyl-6,6'-di-*O*-*tert*-butyldiphenylsilyl- $\alpha$ -D-trehalose (**21**)
- Page S-30:  $^1\text{H}$  NMR of bis(methyl- $\alpha$ -D-*gluco*-octopyranosyluronate) ether (**4**)
- Page S-31:  $^{13}\text{C}$  NMR of bis(methyl- $\alpha$ -D-*gluco*-octopyranosyluronate) ether (**4**)
- Page S-32:  $^1\text{H}$  NMR of bis(methyl-2,3,4-tri-*O*-benzyl- $\alpha$ -D-*gluco*-octopyranosyluronate) ether (**24**)
- Page S-33:  $^{13}\text{C}$  NMR of bis(methyl-2,3,4-tri-*O*-benzyl- $\alpha$ -D-*gluco*-octopyranosyluronate) ether (**24**)
- Page S-34:  $^1\text{H}$  NMR of bis(methyl-2,3,4-tri-*O*-benzyl- $\alpha$ -D-*gluco*-octopyranosyluronic acid) ether (**25**)
- Page S-35:  $^{13}\text{C}$  NMR of bis(methyl-2,3,4-tri-*O*-benzyl- $\alpha$ -D-*gluco*-octopyranosyluronic acid) ether (**25**)
- Page S-36:  $^1\text{H}$  NMR of bis(2,3,4-tri-*O*-benzyl-9-cyano-8-oxo-9-(triphenylphosphanylidene)- $\alpha$ -D-*gluco*-nonopyranosyluronitrile) ether (**26**)
- Page S-37:  $^{13}\text{C}$  NMR of bis(2,3,4-tri-*O*-benzyl-9-cyano-8-oxo-9-(triphenylphosphanylidene)- $\alpha$ -D-*gluco*-nonopyranosyluronitrile) ether (**26**)
- Page S-38:  $^{31}\text{P}$  NMR of bis(2,3,4-tri-*O*-benzyl-9-cyano-8-oxo-9-(triphenylphosphanylidene)- $\alpha$ -D-*gluco*-nonopyranosyluronitrile) ether (**26**)
- Page S-39:  $^1\text{H}$  NMR of bis(methyl-2,3,4-tri-*O*-benzyl-8-oxo- $\alpha$ -D-*gluco*-nonopyranosyluronate) ether (**27**)
- Page S-40:  $^{13}\text{C}$  NMR of bis(methyl-2,3,4-tri-*O*-benzyl-8-oxo- $\alpha$ -D-*gluco*-nonopyranosyluronate) ether (**27**)
- Page S-41:  $^1\text{H}$  NMR of bis(*N*-butyl-2,3,4-tri-*O*-benzyl-8-oxo- $\alpha$ -D-*gluco*-nonopyranosyluronamide) ether (**28**)
- Page S-42:  $^{13}\text{C}$  NMR of bis(*N*-butyl-2,3,4-tri-*O*-benzyl-8-oxo- $\alpha$ -D-*gluco*-nonopyranosyluronamide) ether (**28**)
- Page S-43:  $^1\text{H}$  NMR of trehalose-derived bicyclo-methyl ester (**29**)
- Page S-44:  $^{13}\text{C}$  NMR of trehalose-derived bicyclo-methyl ester (**29**)
- Page S-45:  $^1\text{H}$  NMR of trehalose-derived bicyclo-*N*-butylamide (**30**)
- Page S-46:  $^{13}\text{C}$  NMR of trehalose-derived bicyclo-*N*-butylamide (**30**)

**<sup>1</sup>H NMR of methyl 2,3-di-O-benzyl-5-O-trityl-β-D-arabinofuranoside (8)**

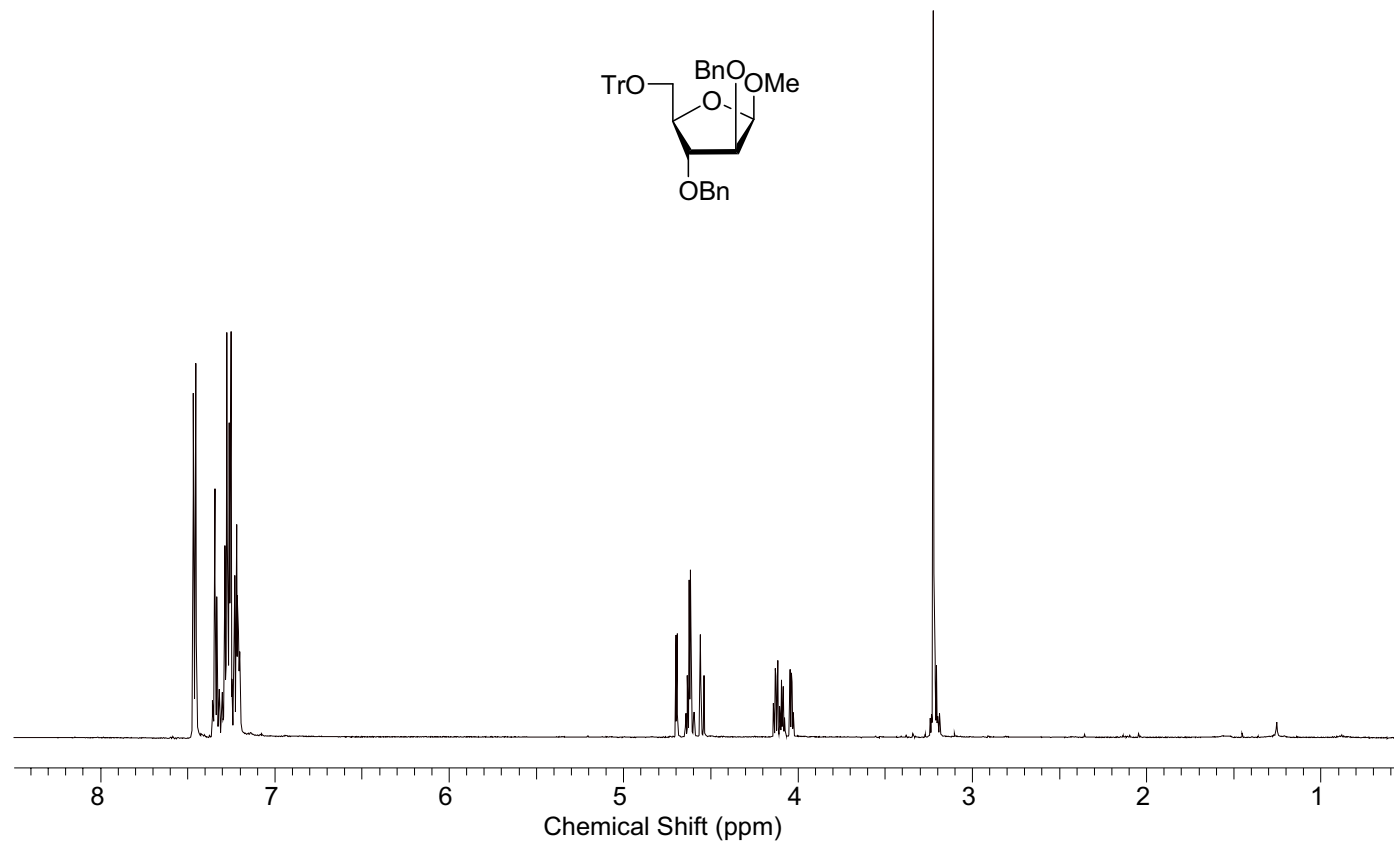

**$^{13}\text{C}$  NMR of methyl 2,3-di-*O*-benzyl-5-*O*-trityl- $\beta$ -D-arabinofuranoside (8)**

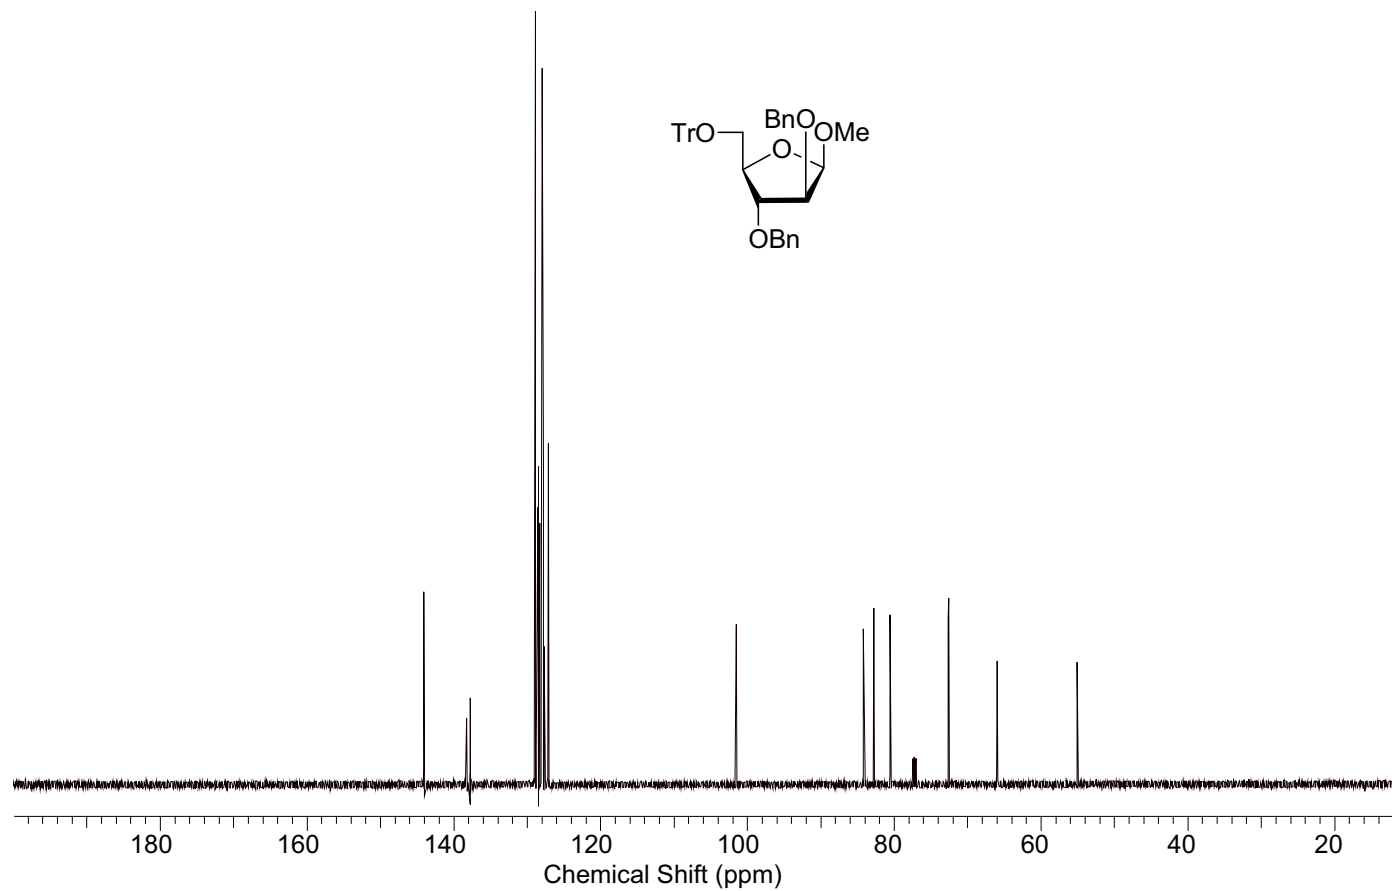

**<sup>1</sup>H NMR of methyl (5*E*)-2,3-di-*O*-benzyl-5,6-dideoxy-β-*D*-arabino-hept-5-enofuranosiduronic acid methyl ester (10)**

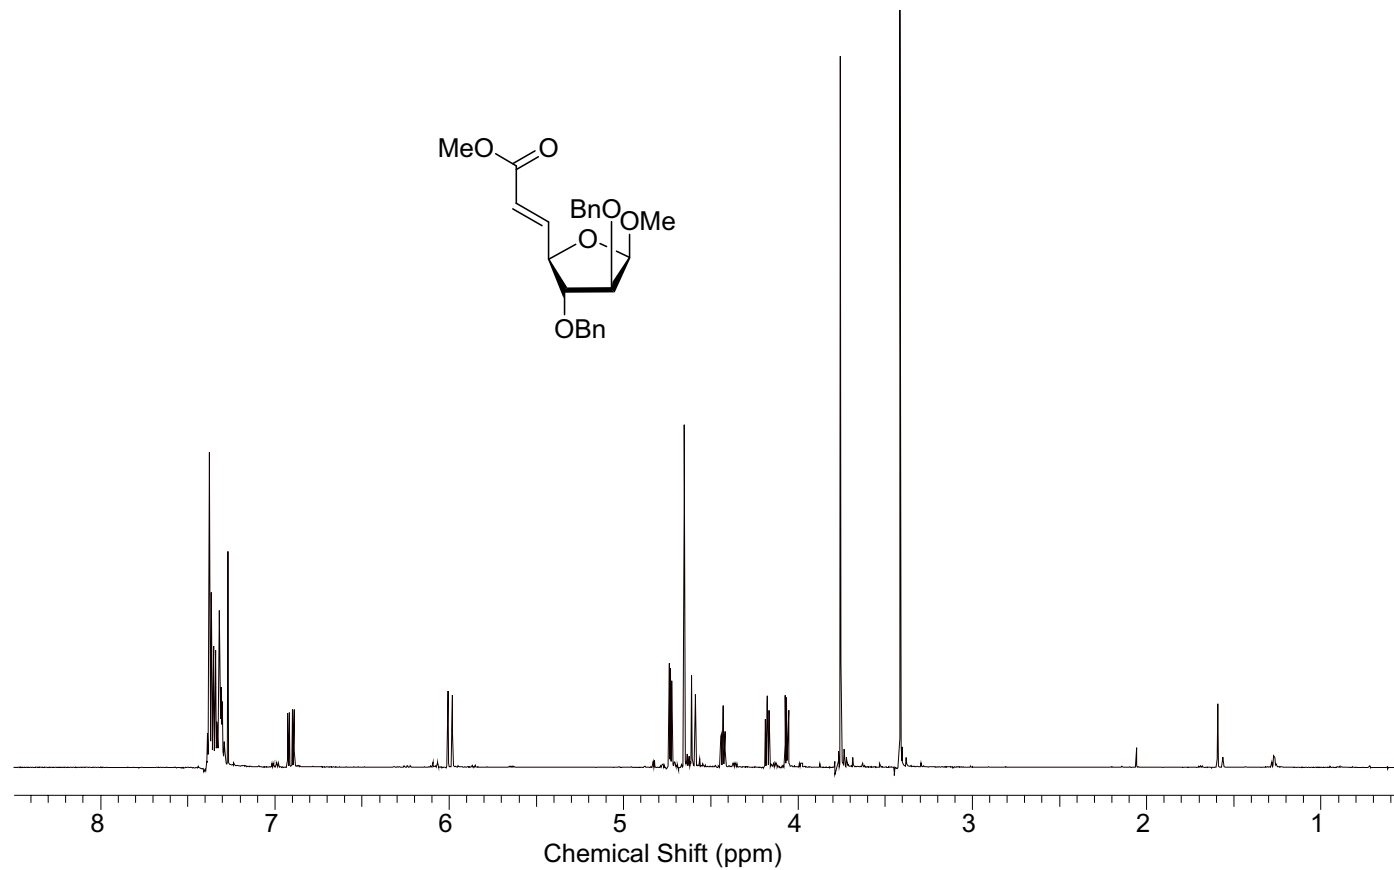

**$^{13}\text{C}$  NMR of methyl (5*E*)-2,3-di-*O*-benzyl-5,6-dideoxy- $\beta$ -D-arabino-hept-5-enofuranosiduronic acid methyl ester (10)**

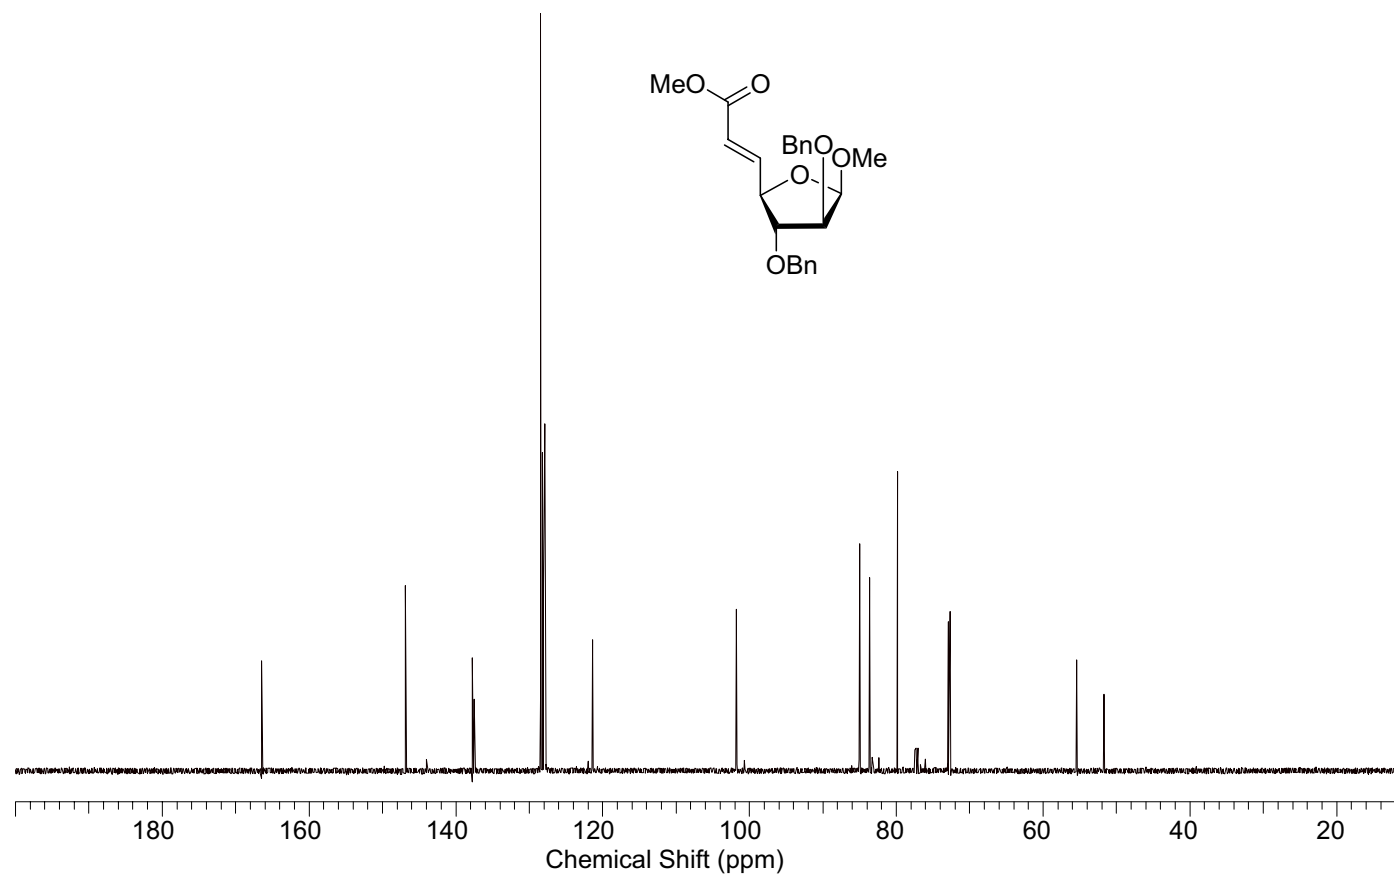

### $^1\text{H}$ NMR of methyl $\beta$ -D-arabino-heptafuranosiduronic acid methyl ester (1)

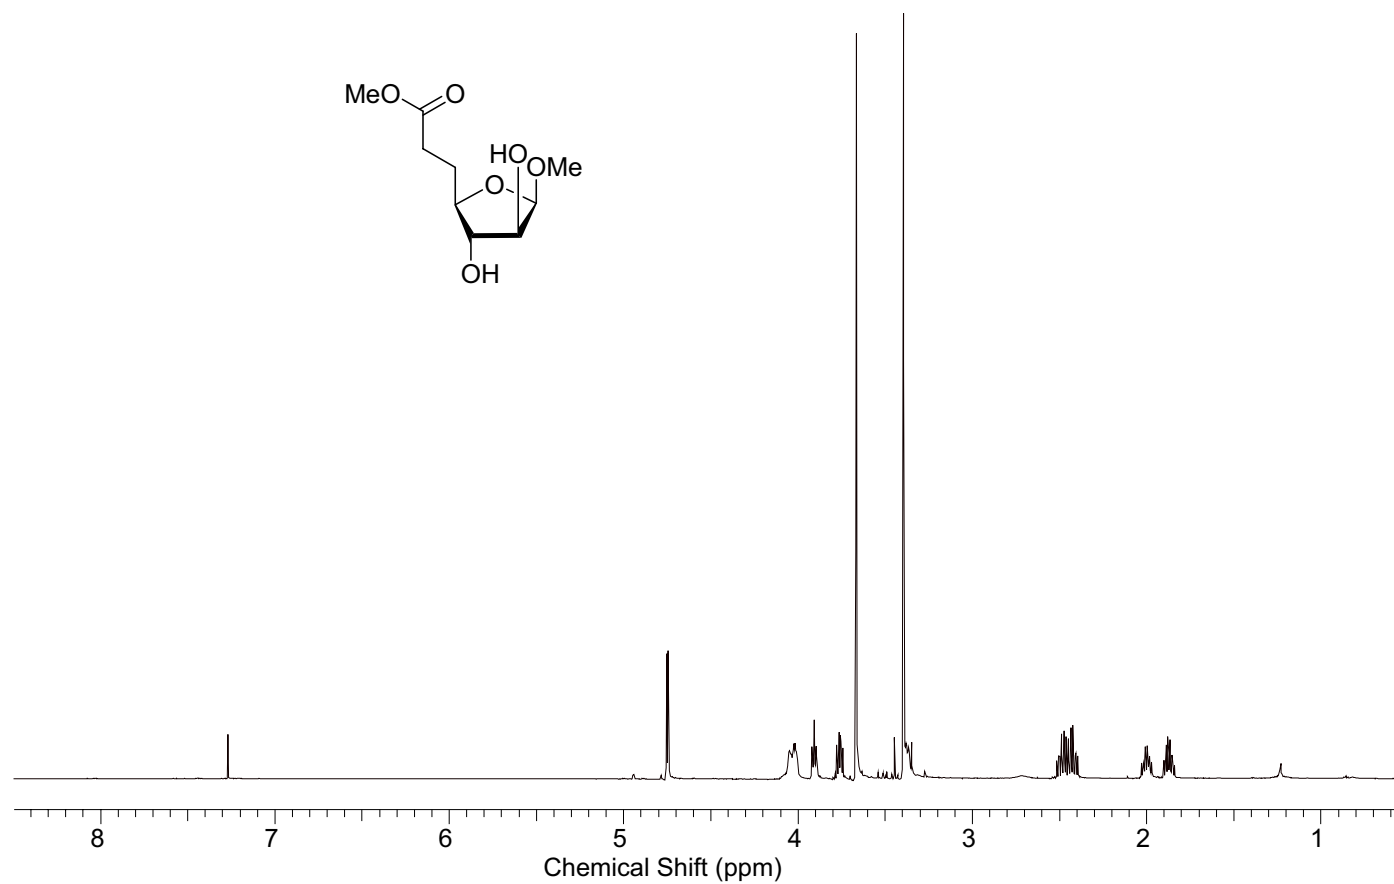

### $^{13}\text{C}$ NMR of methyl $\beta$ -D-arabino-heptafuranosiduronic acid methyl ester (1)

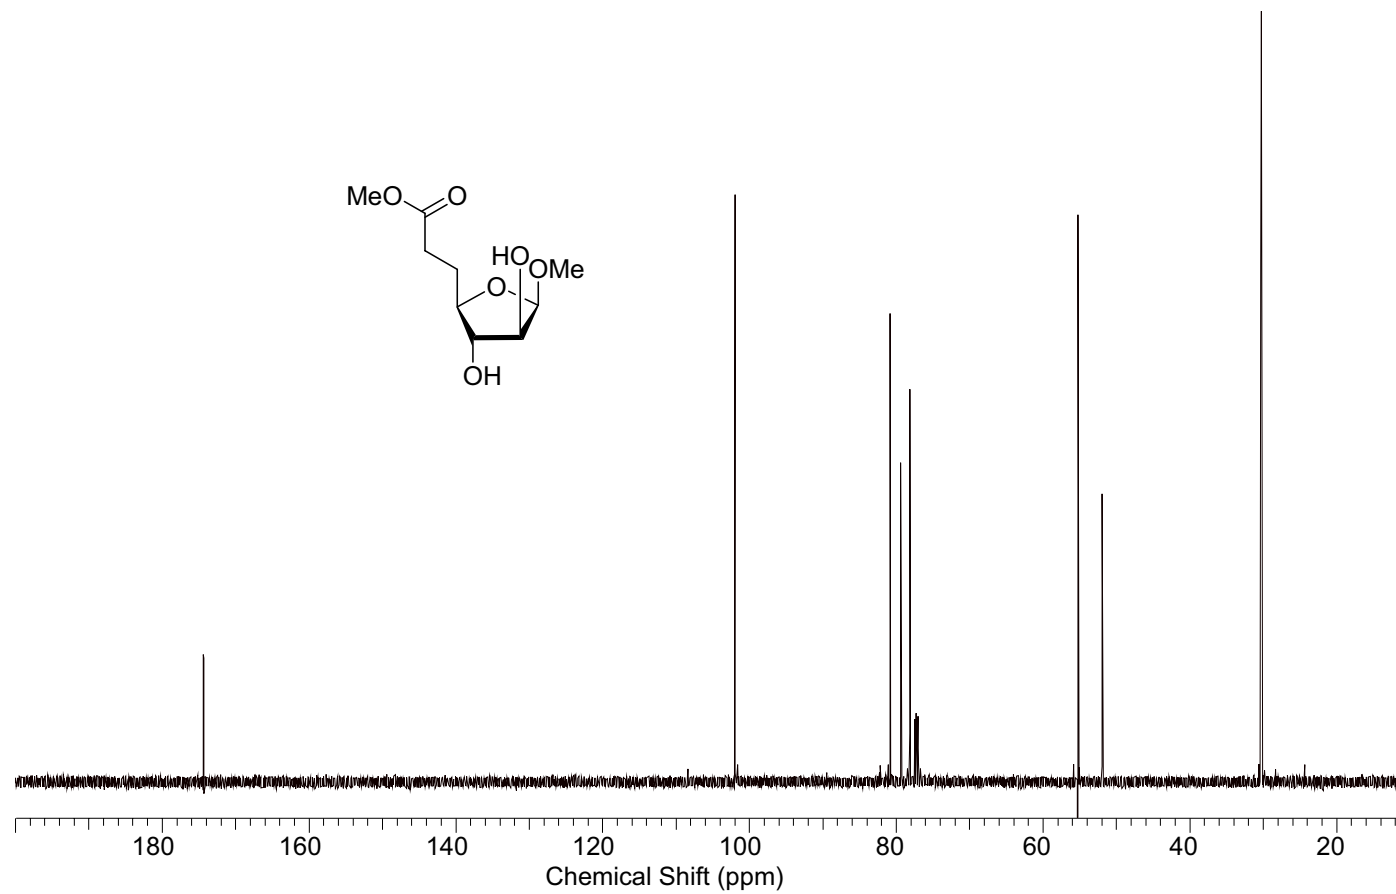

**<sup>1</sup>H NMR of methyl 2,3-di-O-benzyl-β-D-arabino-heptafuranosiduronic acid methyl ester (11)**

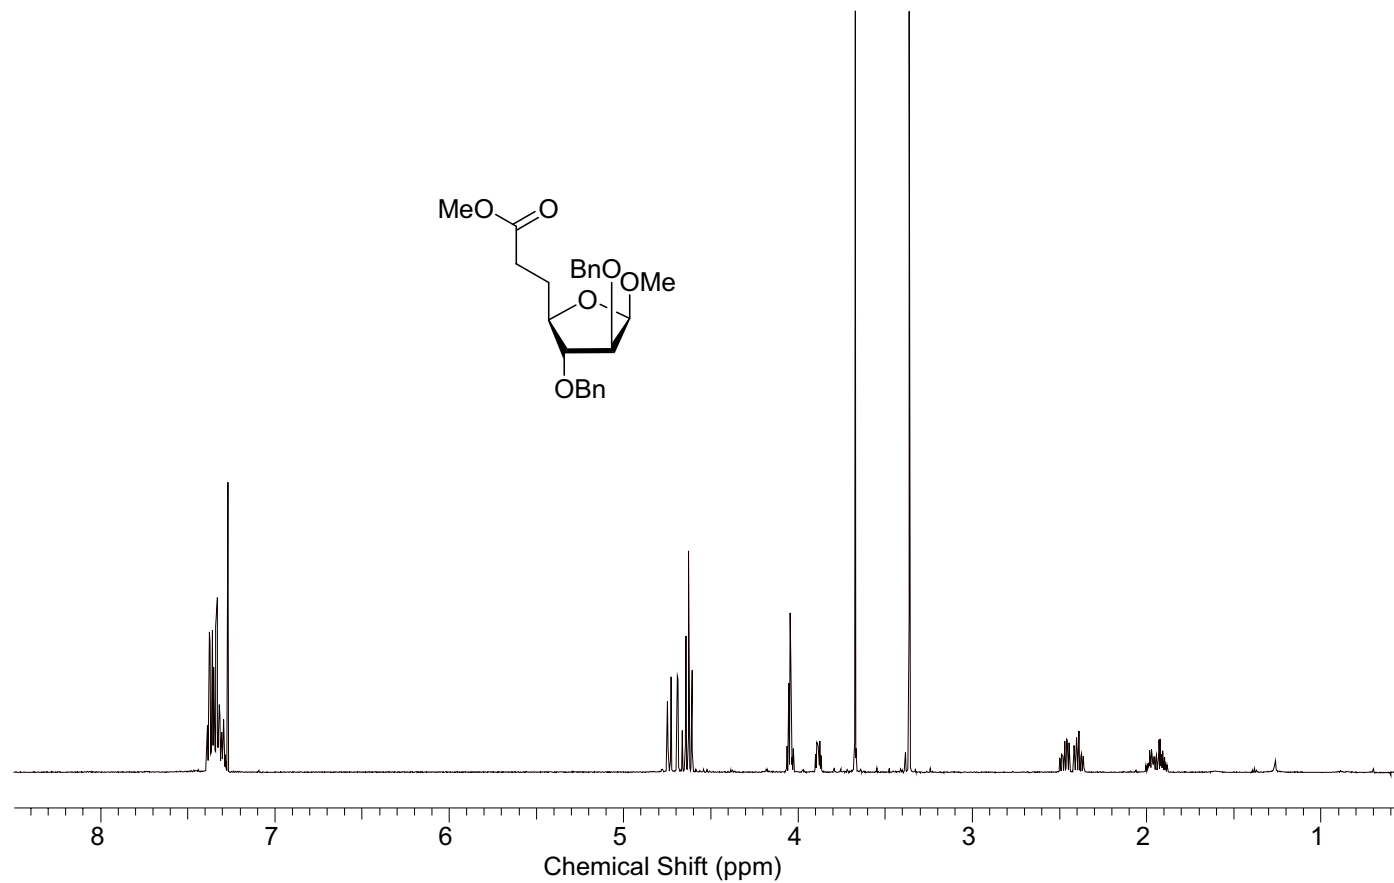

**$^{13}\text{C}$  NMR of methyl 2,3-di-*O*-benzyl- $\beta$ -D-arabino-heptafuranosiduronic acid methyl ester (11)**

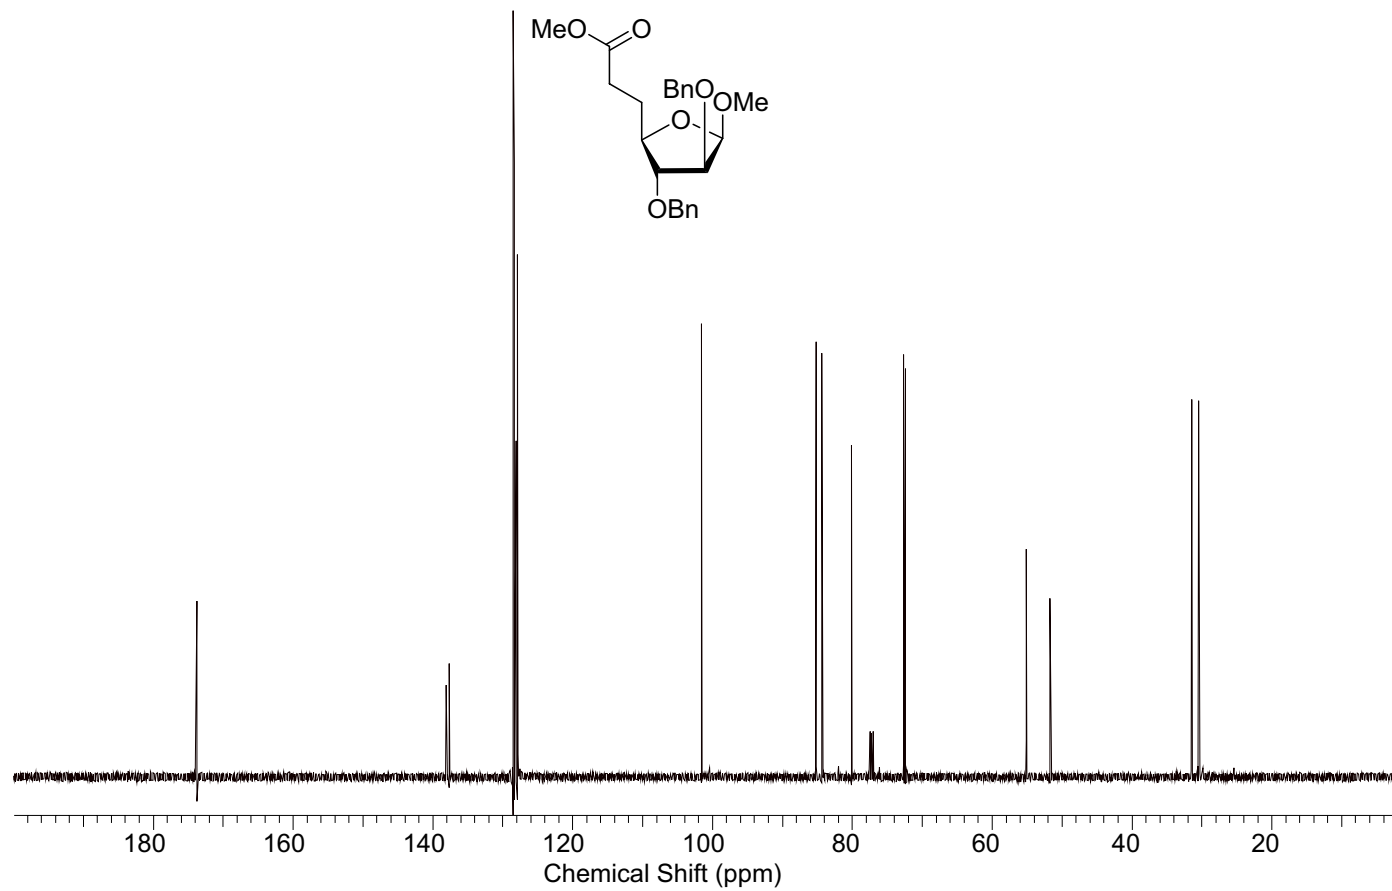

**$^1\text{H}$  NMR of methyl 2,3-di-*O*-benzyl- $\beta$ -D-arabino-heptafuranosiduronic acid (12)**

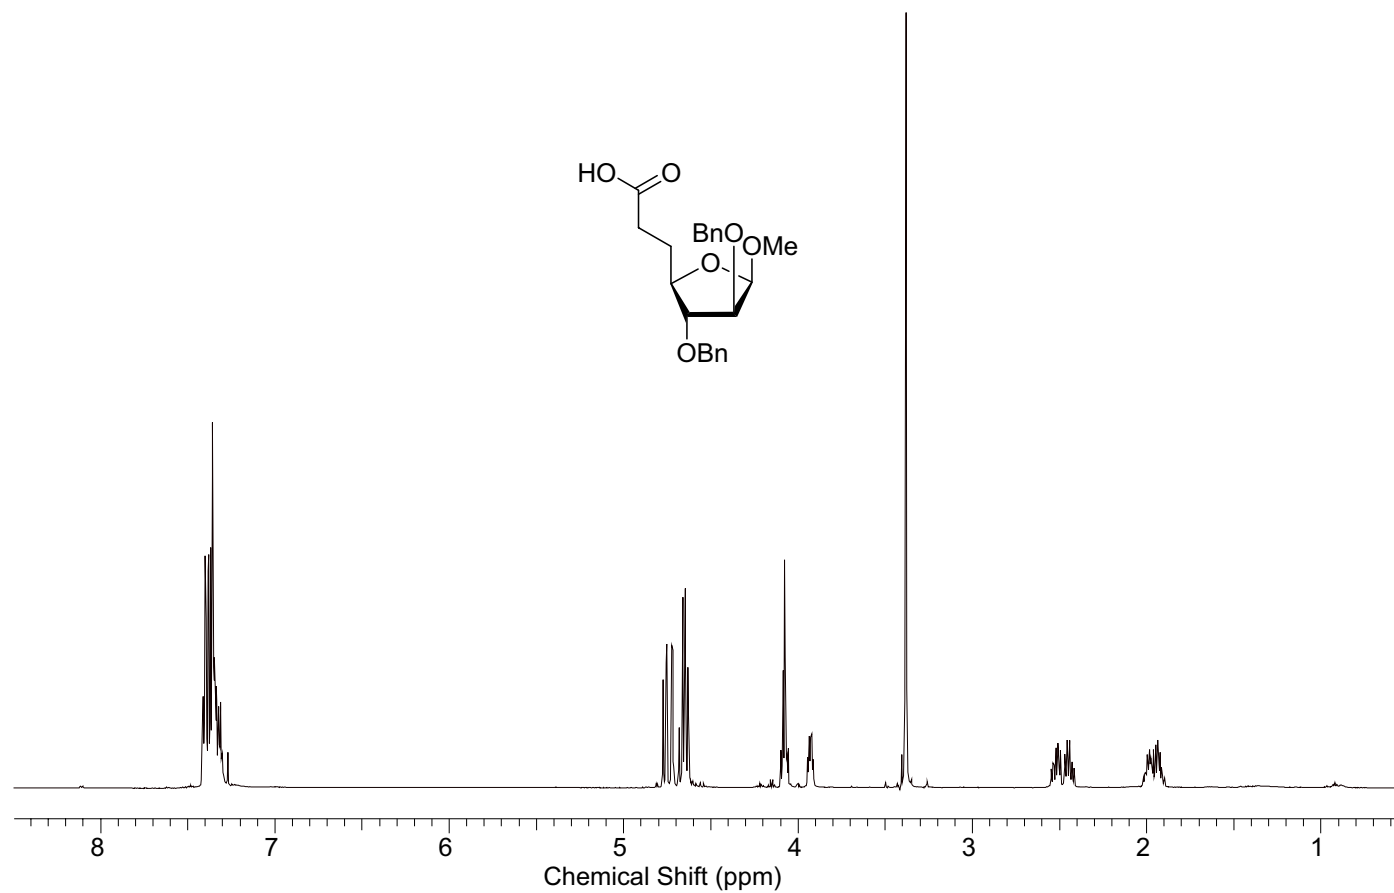

**$^{13}\text{C}$  NMR of methyl 2,3-di-*O*-benzyl- $\beta$ -D-arabino-heptafuranosiduronic acid (12)**

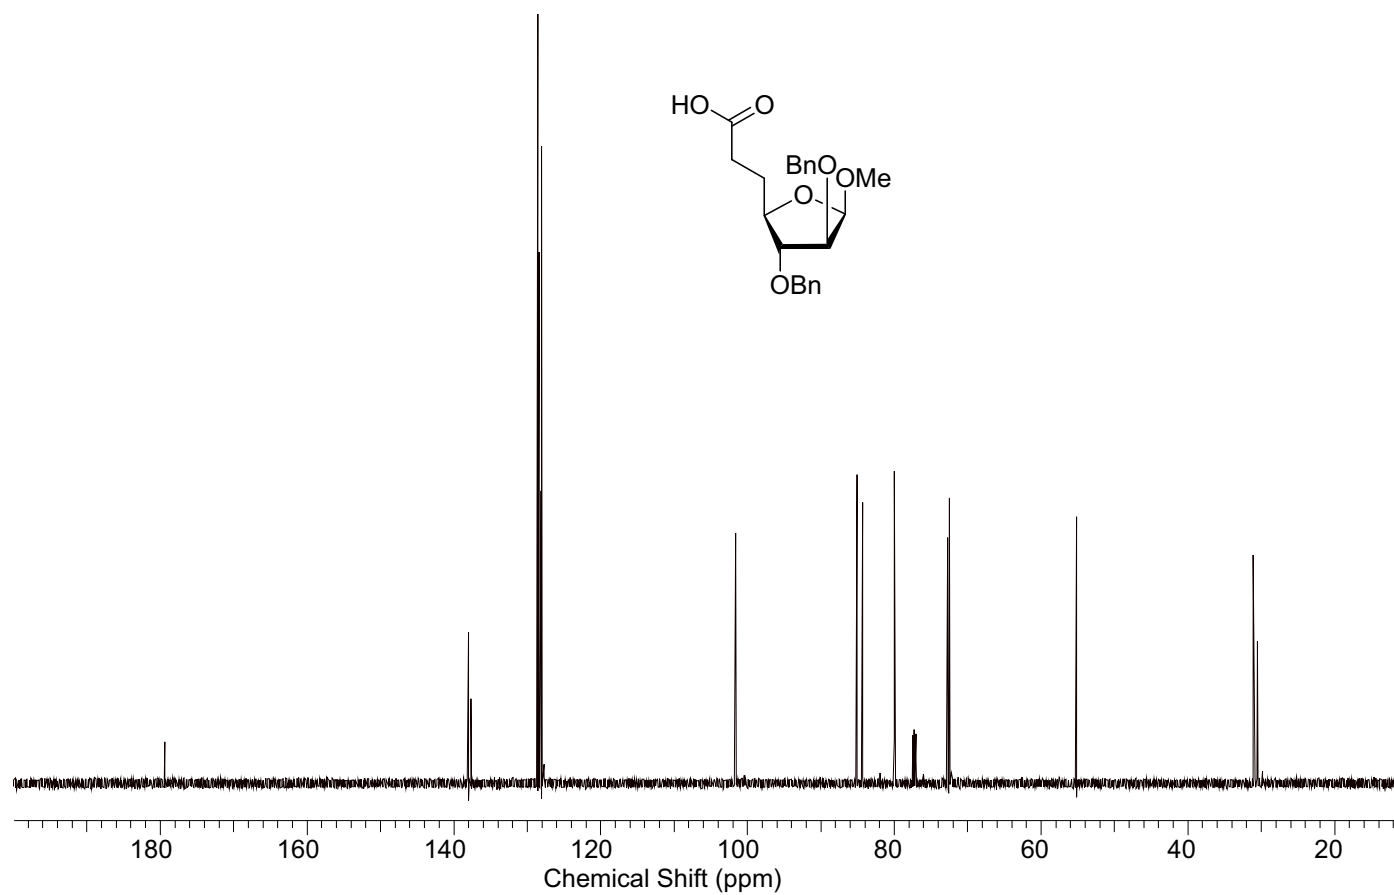

**$^1\text{H}$  NMR of methyl 2,3-di-*O*-benzyl-7-keto- $\beta$ -D-arabino-nonafuranosiduronitrile (13)**

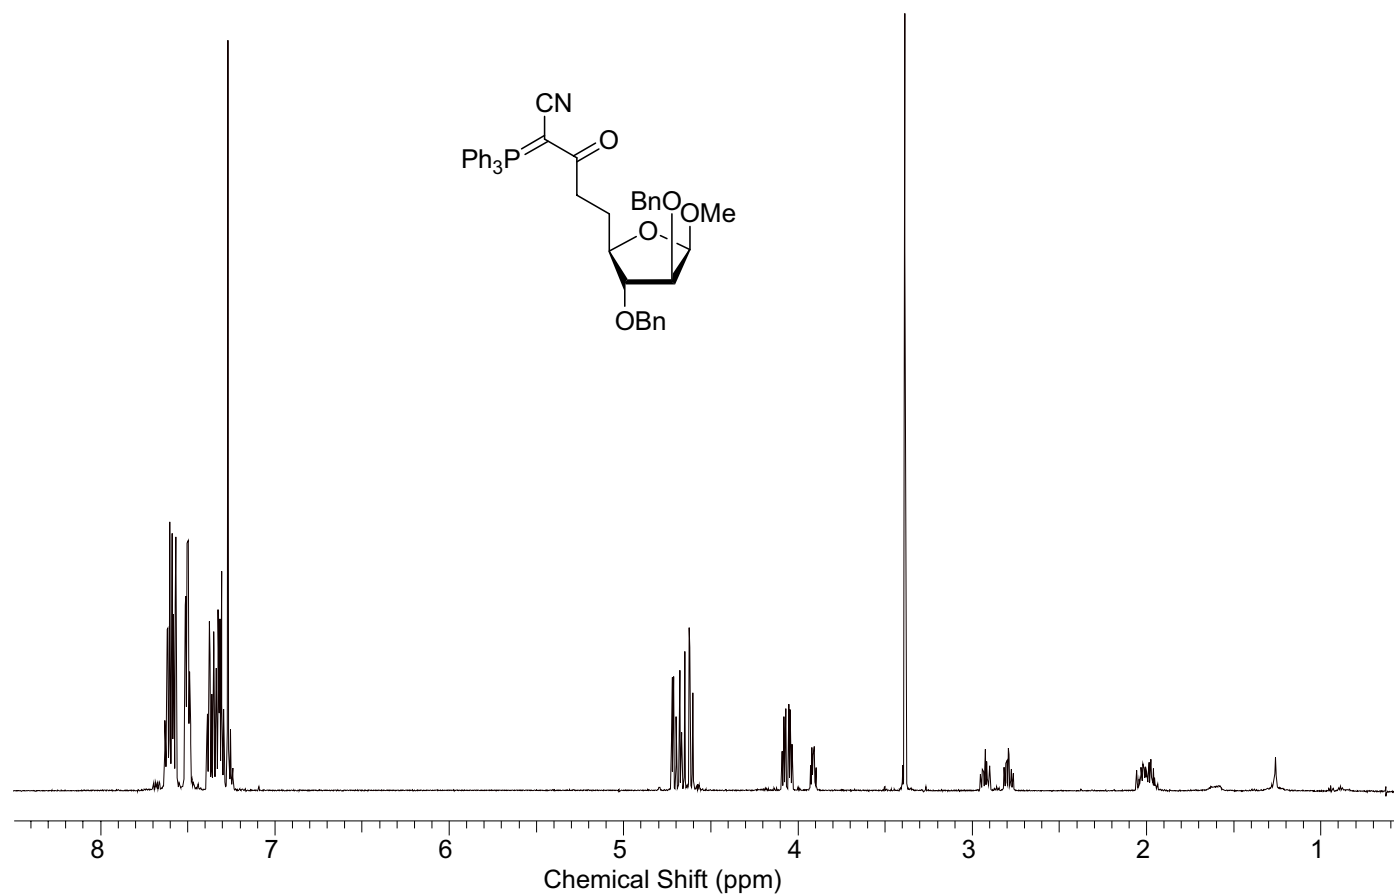



**$^{31}\text{P}$  NMR of methyl 2,3-di-*O*-benzyl-7-keto- $\beta$ -D-arabino-nonafuranosiduronitrile (13)**

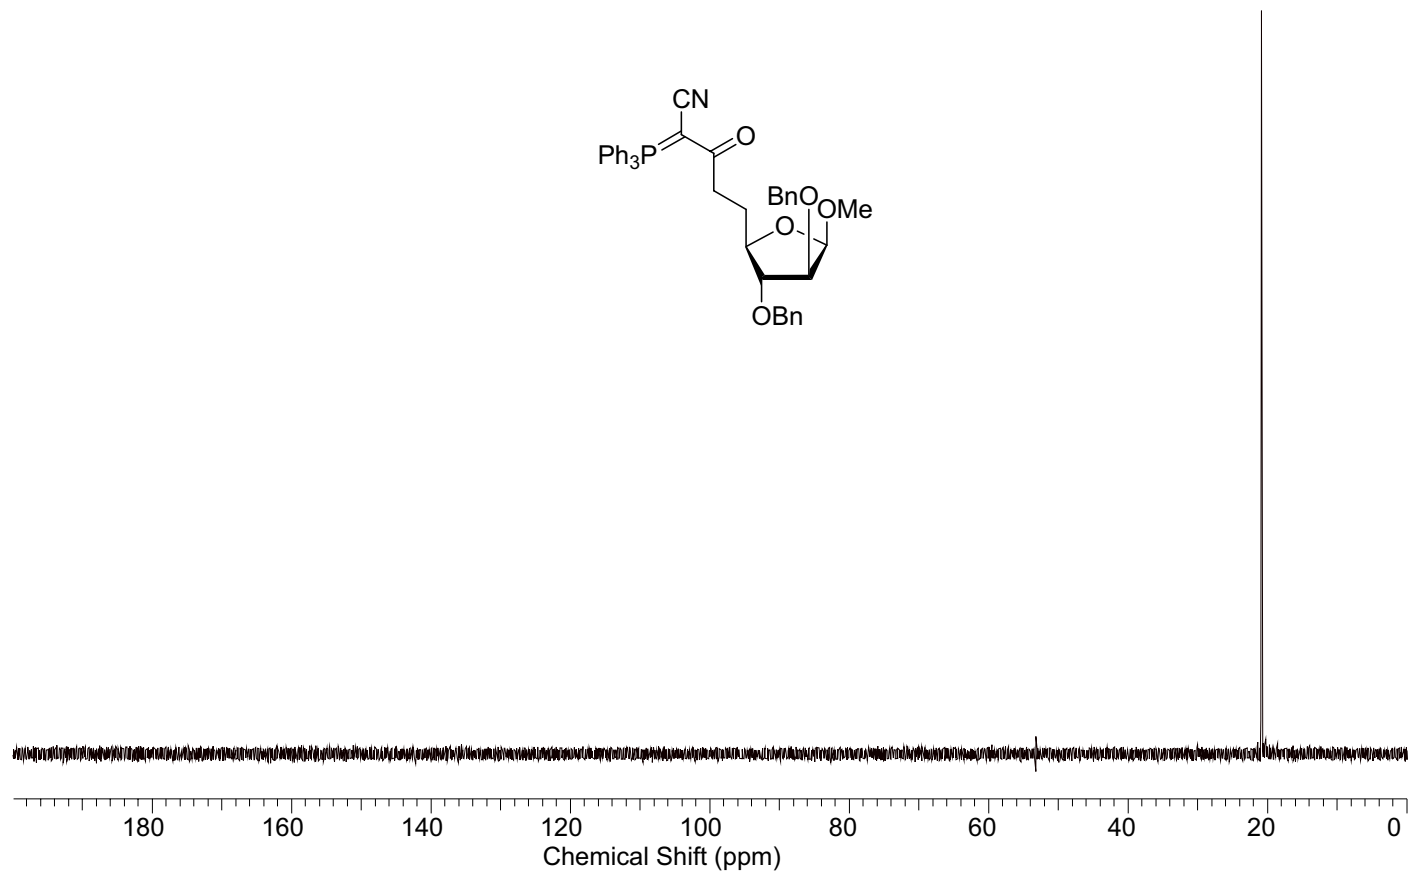

**$^1\text{H}$  NMR of methyl 2,3-di-*O*-benzyl-7-keto- $\beta$ -D-arabino-octafuranosiduronic acid methyl ester (14)**

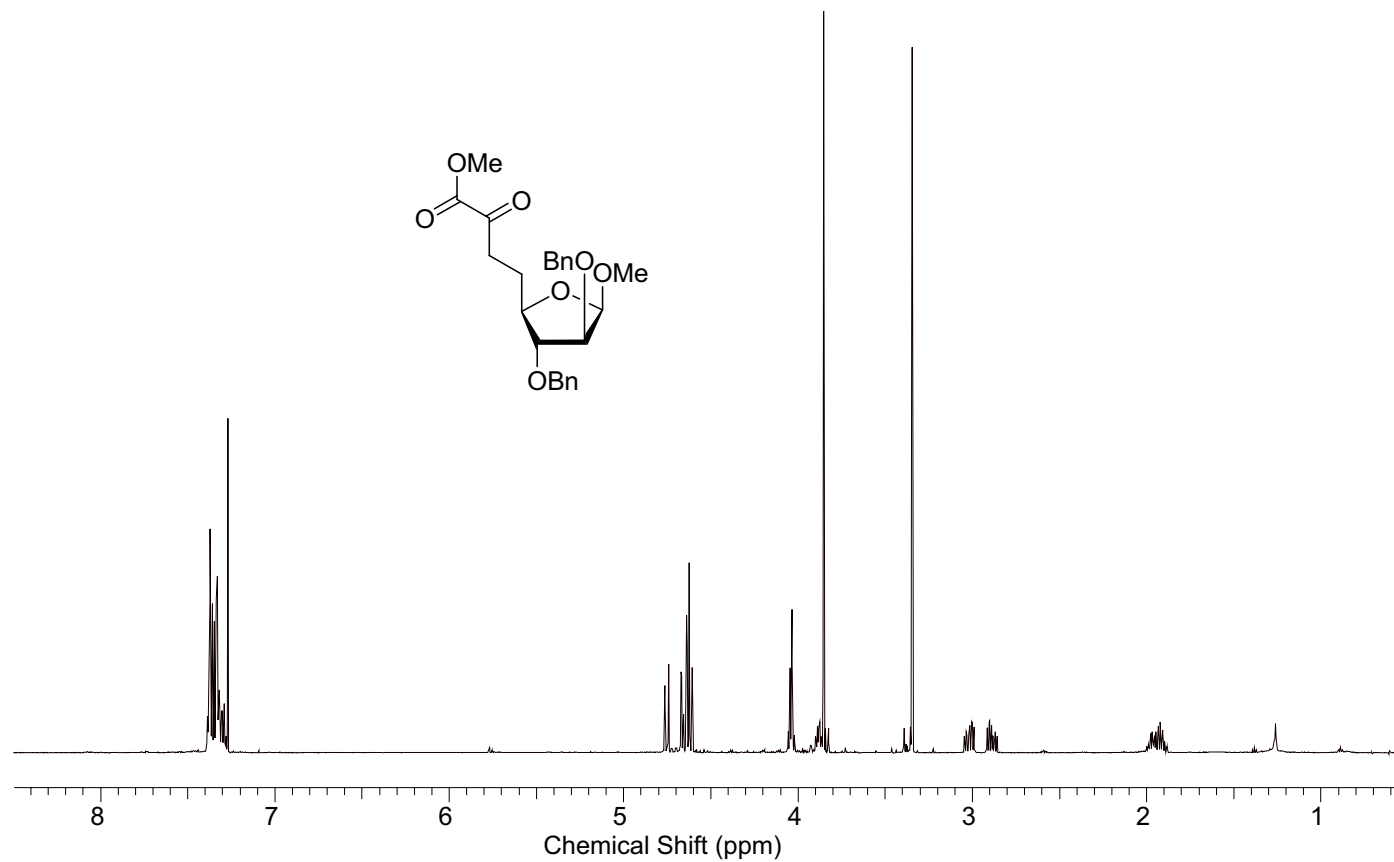

**$^{13}\text{C}$  NMR of methyl 2,3-di-*O*-benzyl-7-keto- $\beta$ -D-arabino-octafuranosiduronic acid methyl ester (14)**

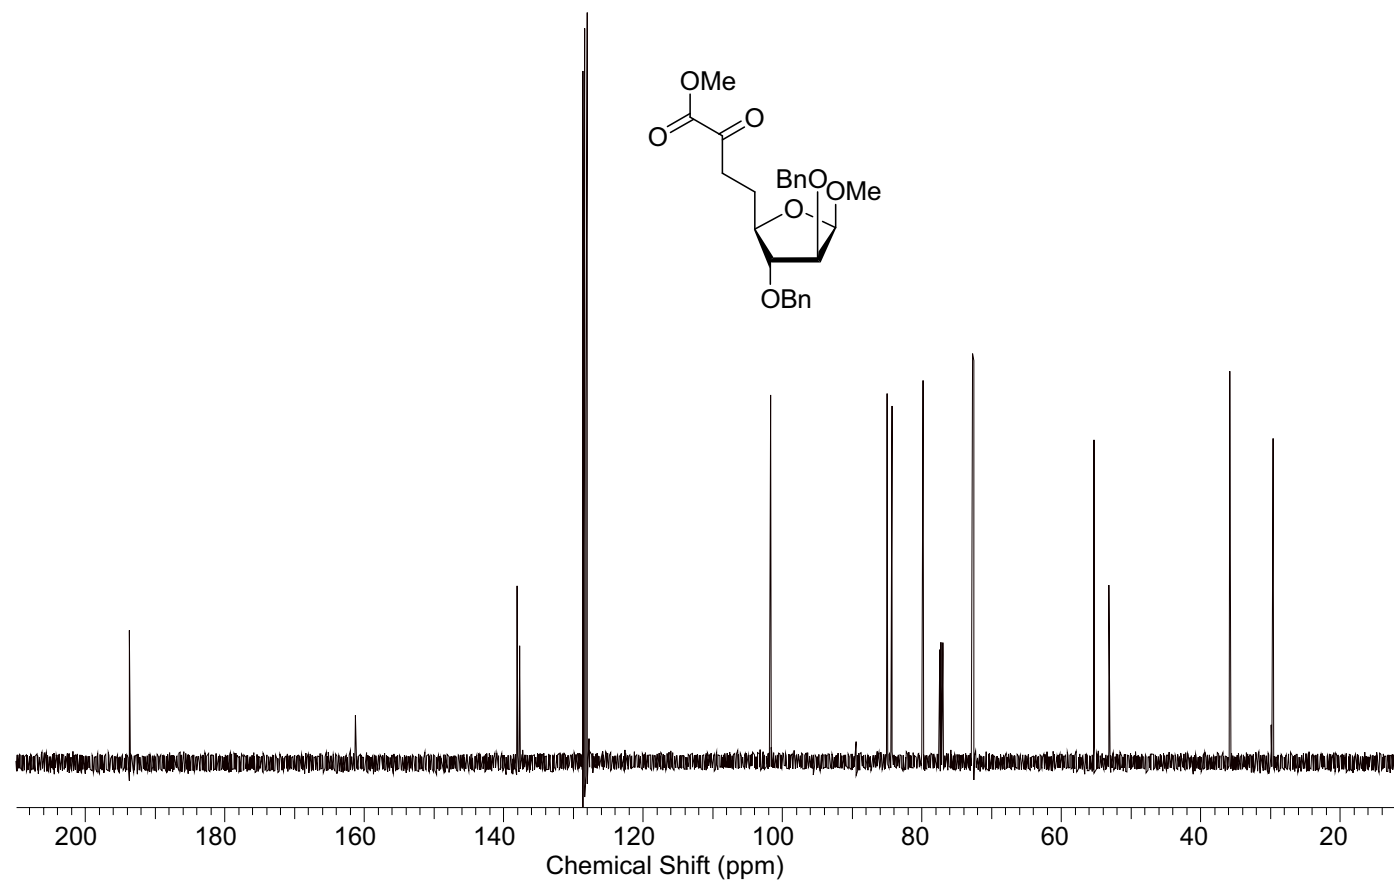

### $^1\text{H}$ NMR of methyl 7-keto- $\beta$ -D-arabino-octafuranosiduronic acid methyl ester (2)

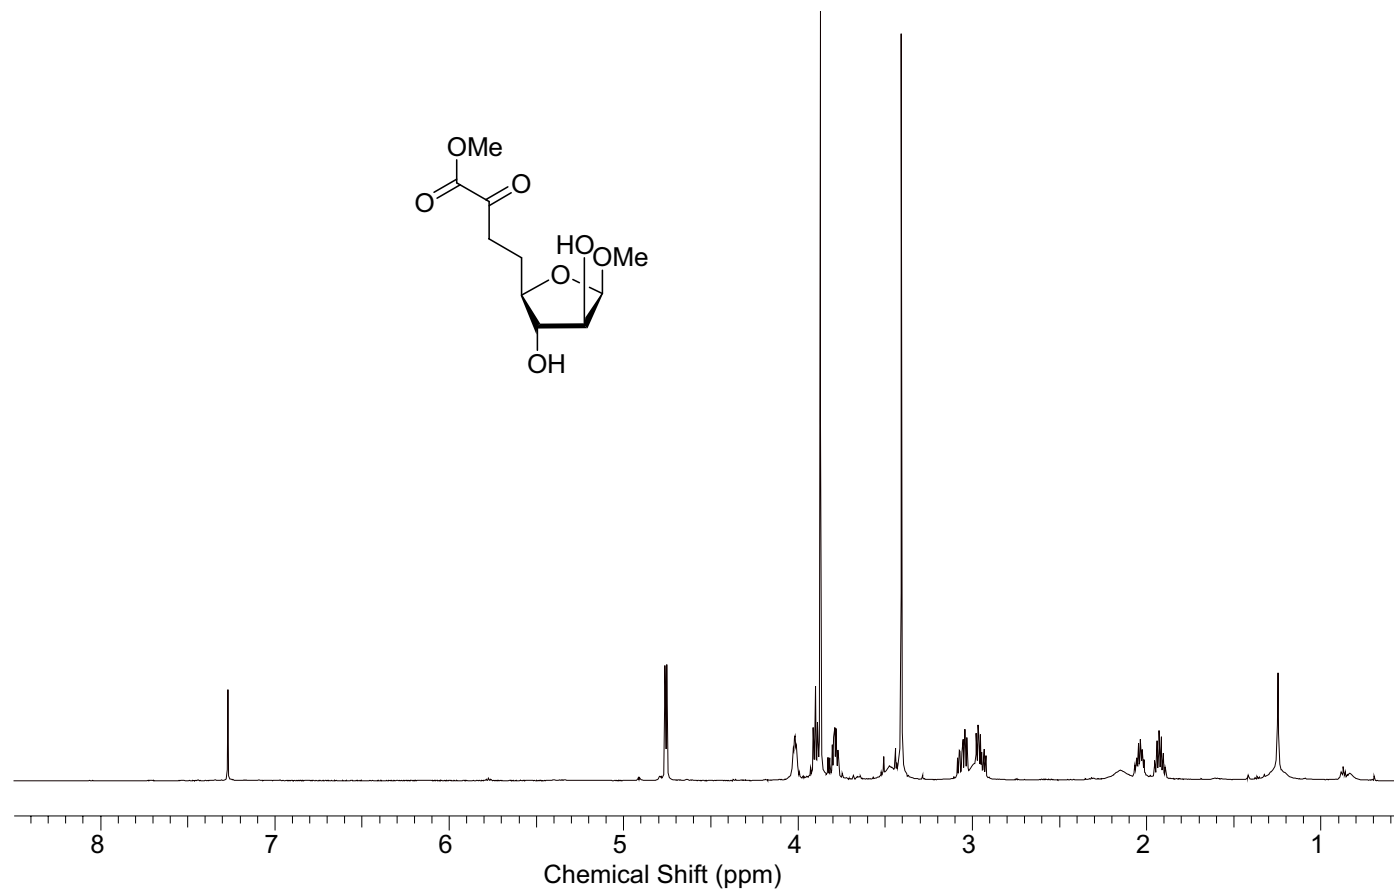

**$^{13}\text{C}$  NMR of methyl 7-keto- $\beta$ -D-arabino-octafuranosiduronic acid methyl ester (2)**

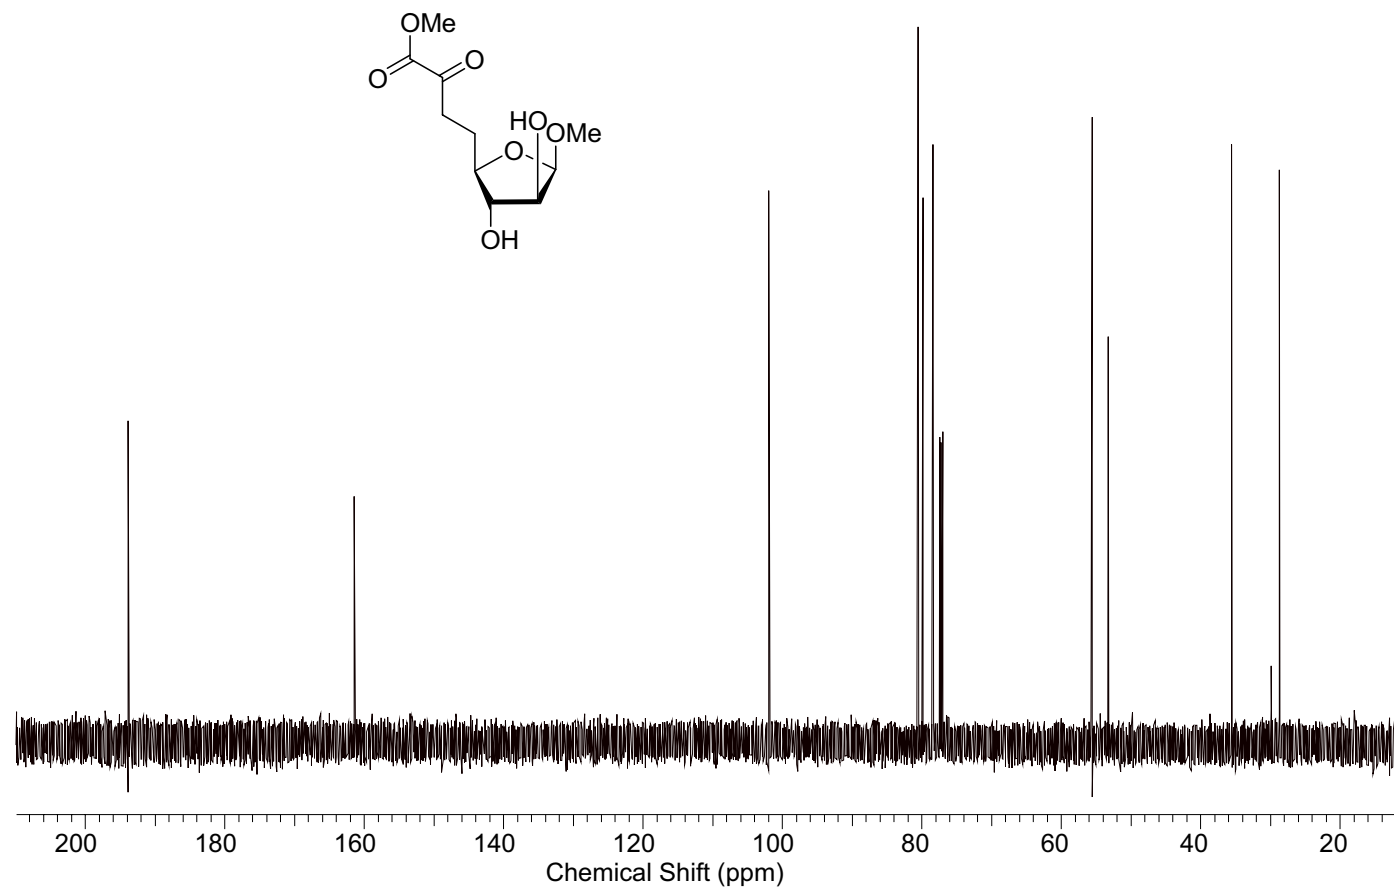

**$^1\text{H}$  NMR of methyl *N*-butyl-2,3-di-*O*-benzyl-7-keto- $\beta$ -D-arabino-octafuranosiduronamide (15)**

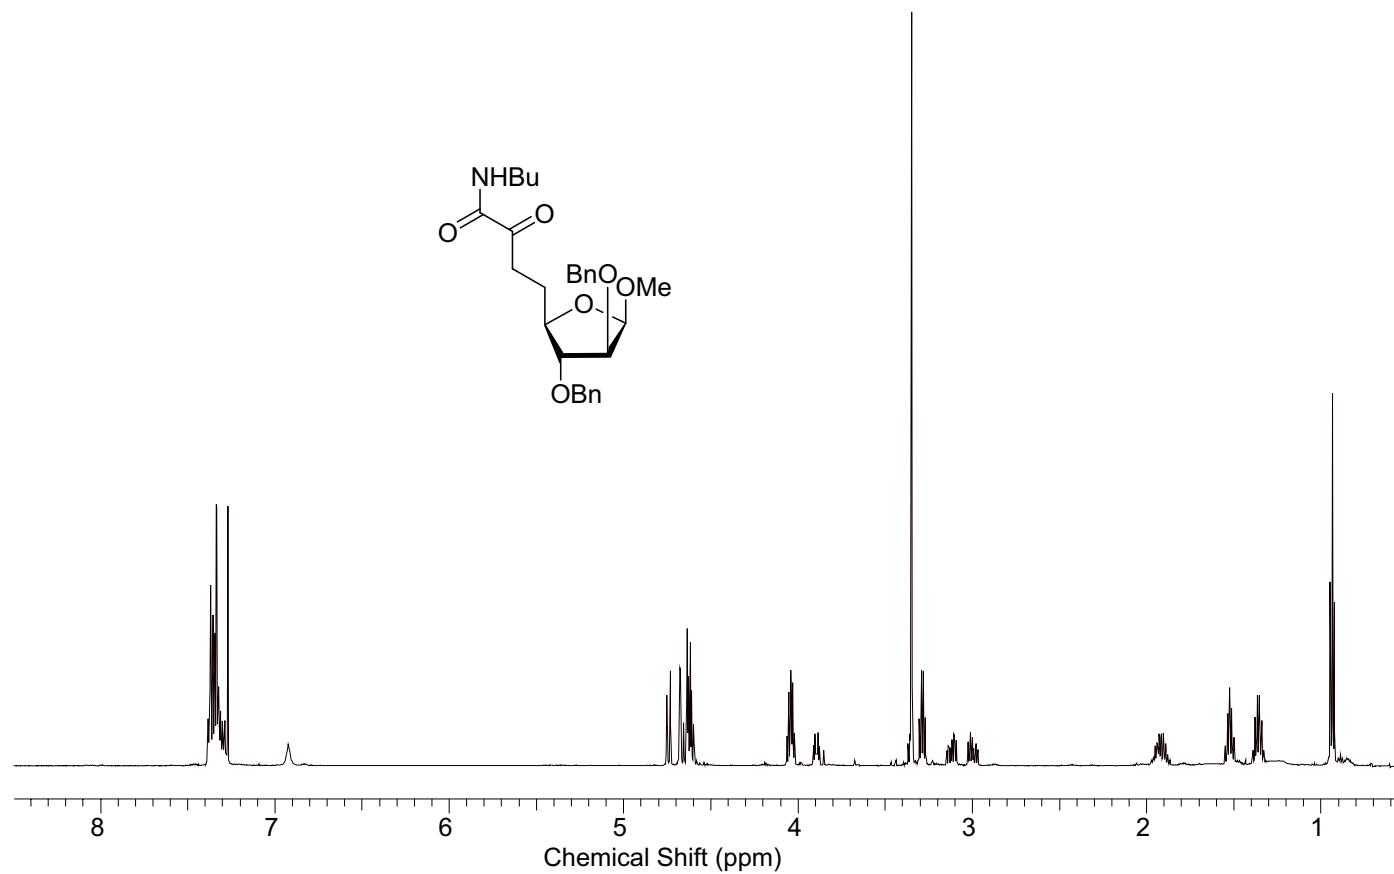

**$^{13}\text{C}$  NMR of methyl *N*-butyl-2,3-di-*O*-benzyl-7-keto- $\beta$ -D-arabino-octafuranosiduronamide (15)**

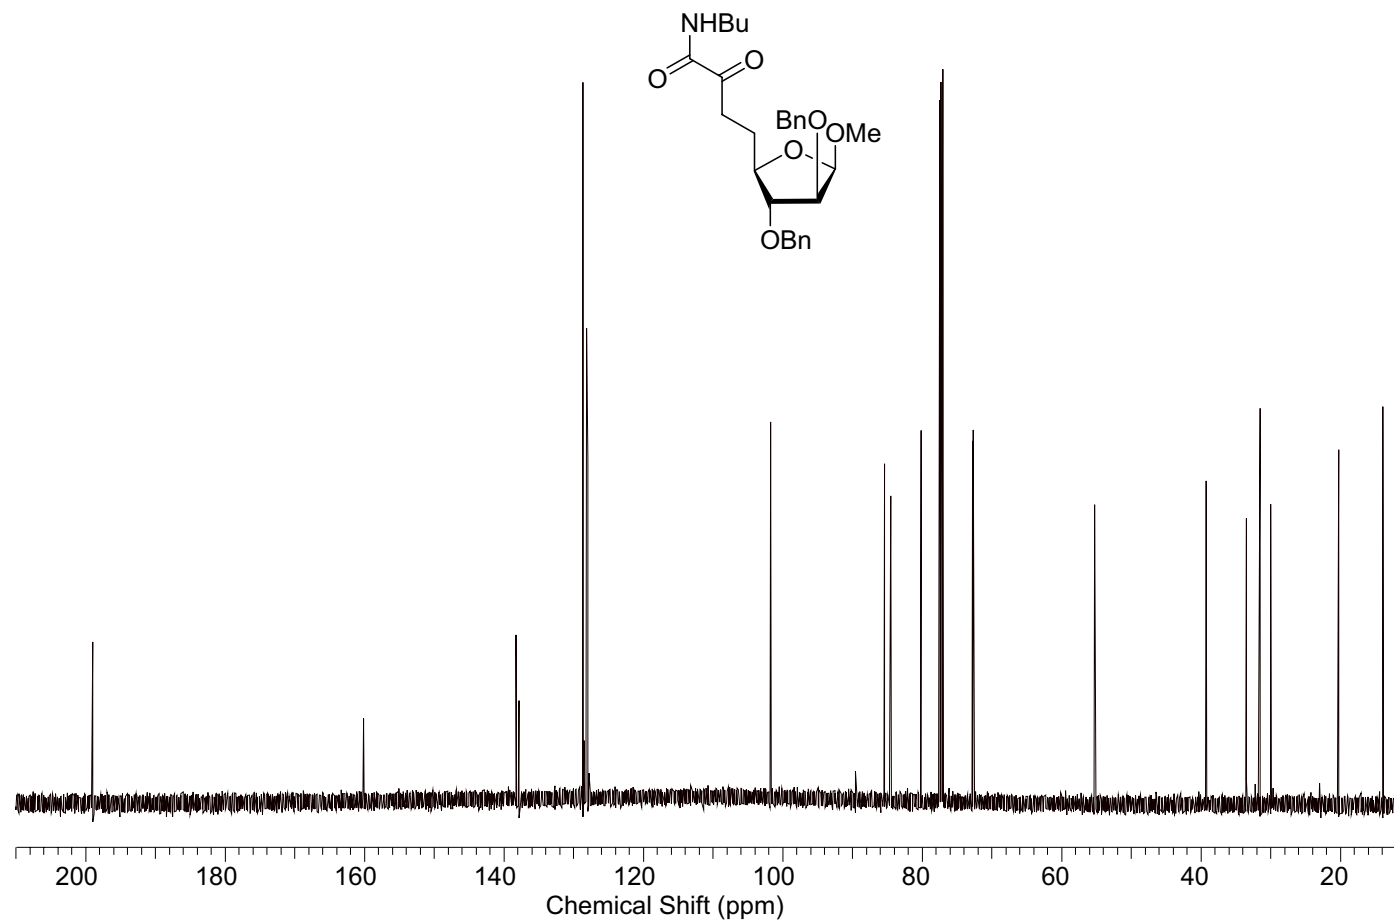

### $^1\text{H}$ NMR of methyl *N*-butyl-7-keto- $\beta$ -D-arabino-octafuranosiduronamide (3)

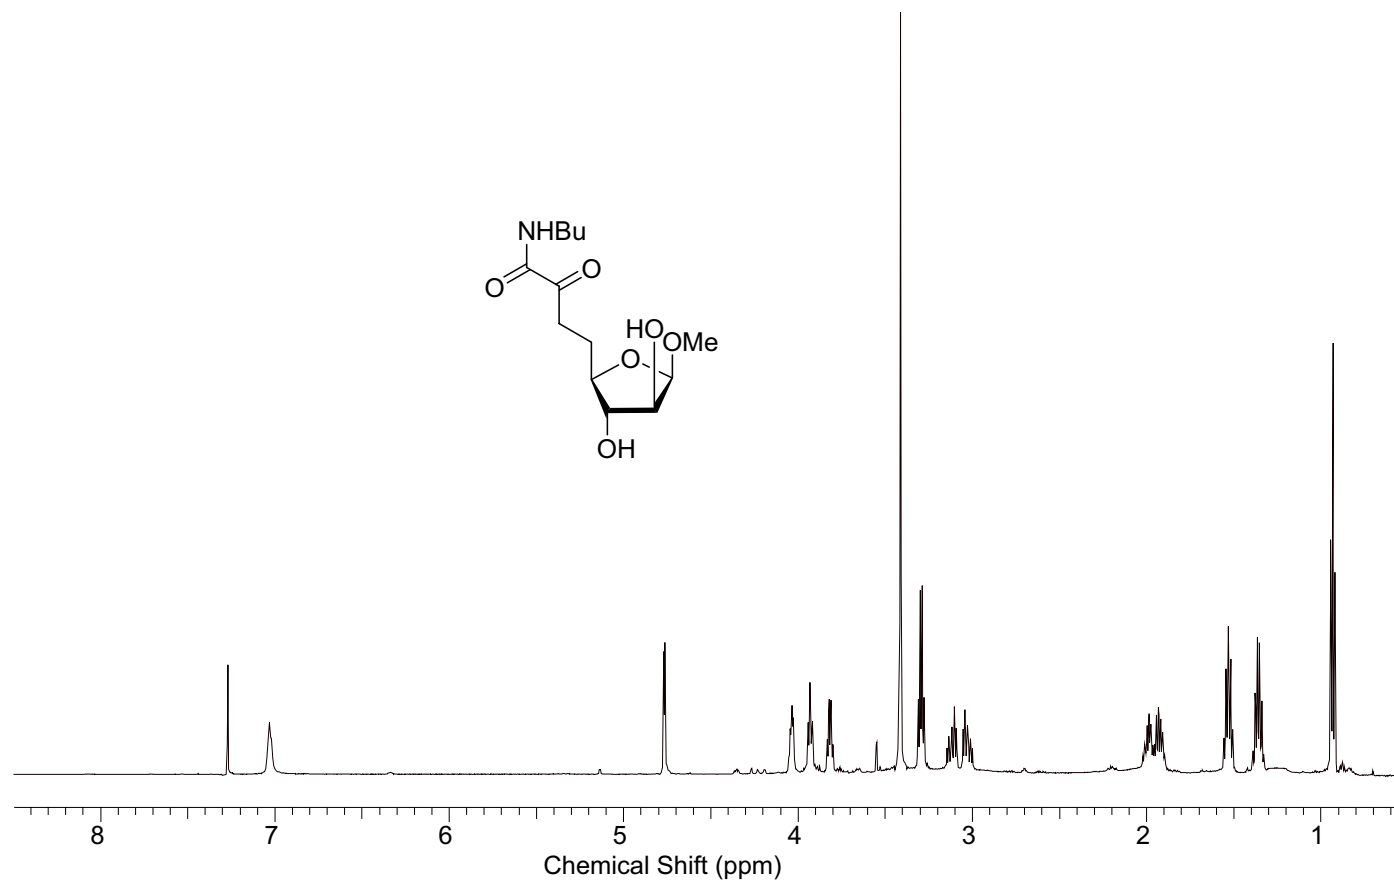

**$^{13}\text{C}$  NMR of methyl *N*-butyl-7-keto- $\beta$ -D-arabino-octafuranosiduronamide (3)**

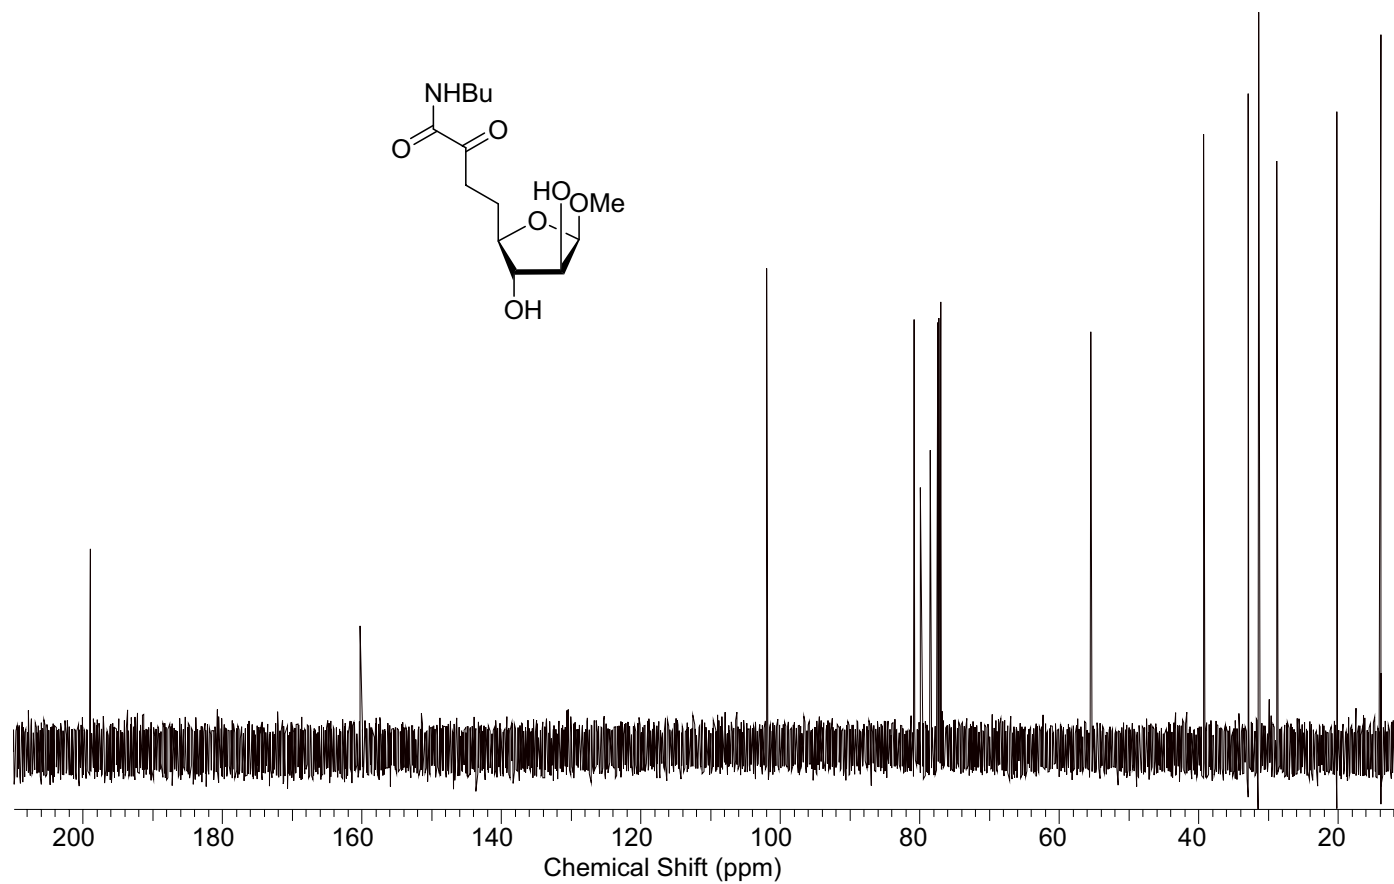

**$^1\text{H}$  NMR of 6, 6'-di-*O*-*tert*-butyldiphenylsilyl- $\alpha$ -D-trehalose (18)**

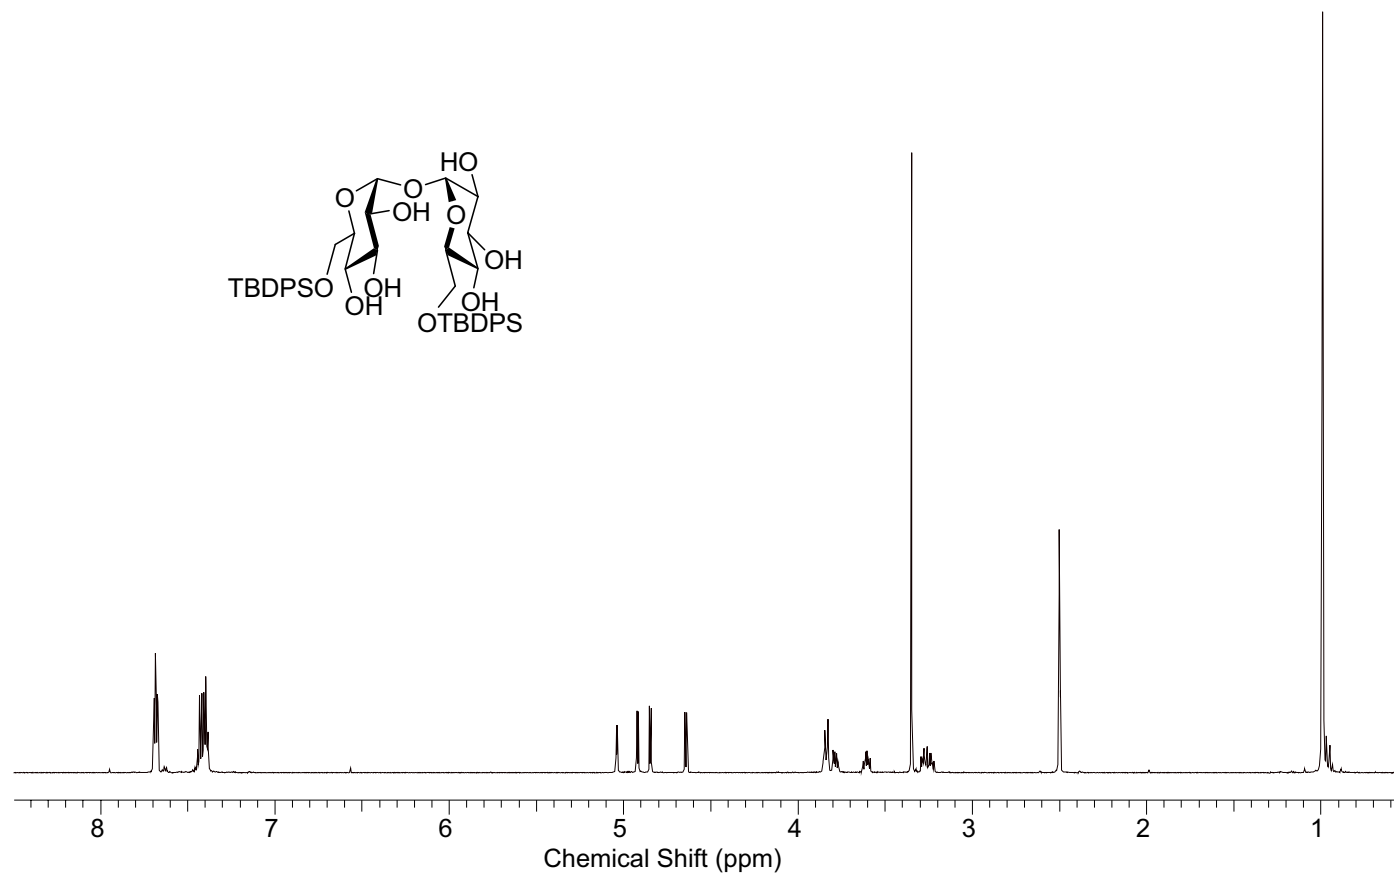

**$^{13}\text{C}$  NMR of 6, 6'-di-*O*-*tert*-butyldiphenylsilyl- $\alpha$ -D-trehalose (18)**

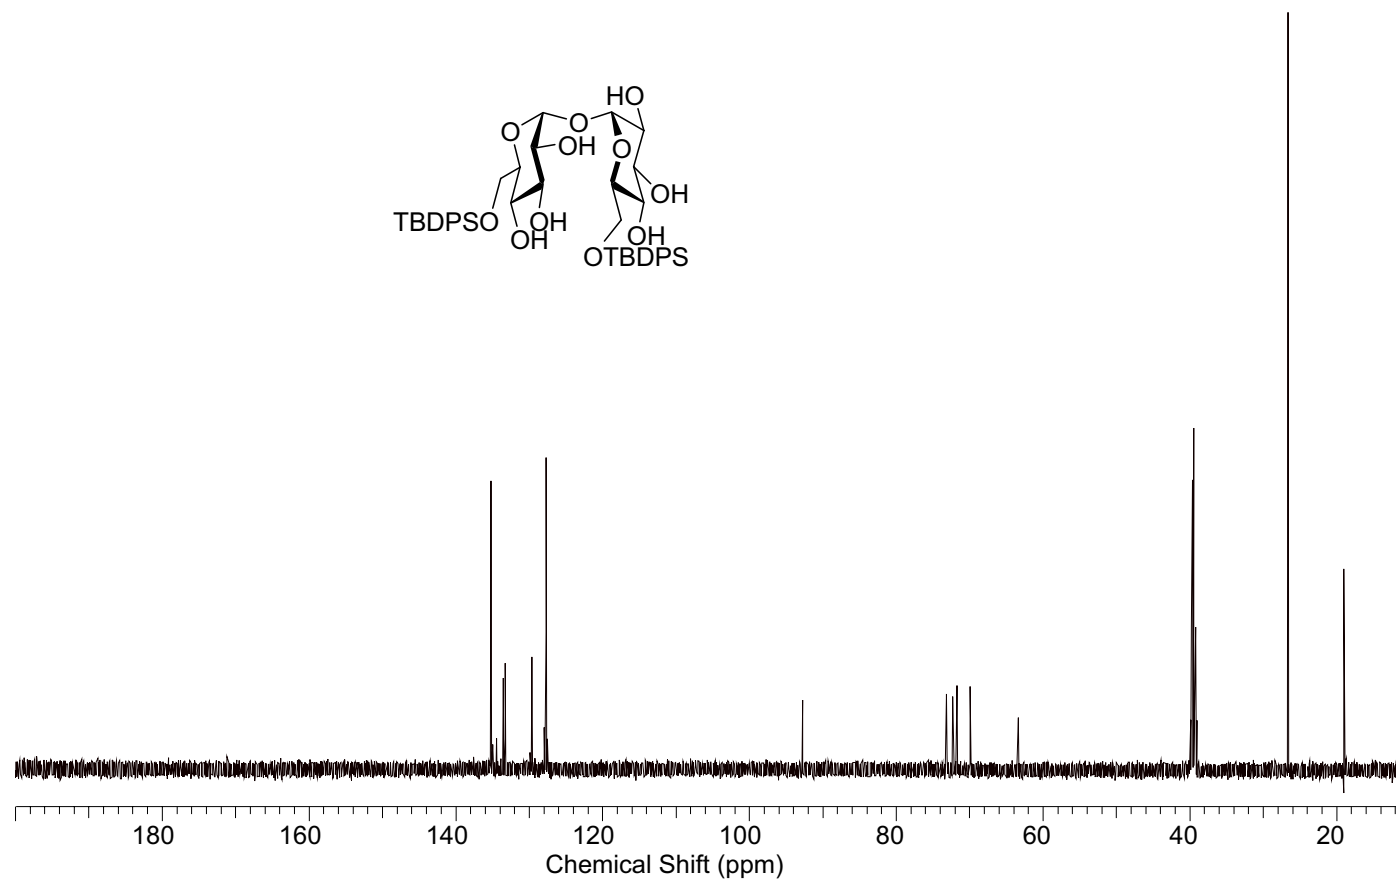

**<sup>1</sup>H NMR of 2,2',3,3',4,4',6'-Hepta-*O*-benzyl-6,6'-di-*O*-*tert*-butyldiphenylsilyl- $\alpha$ -D-trehalose (20)**

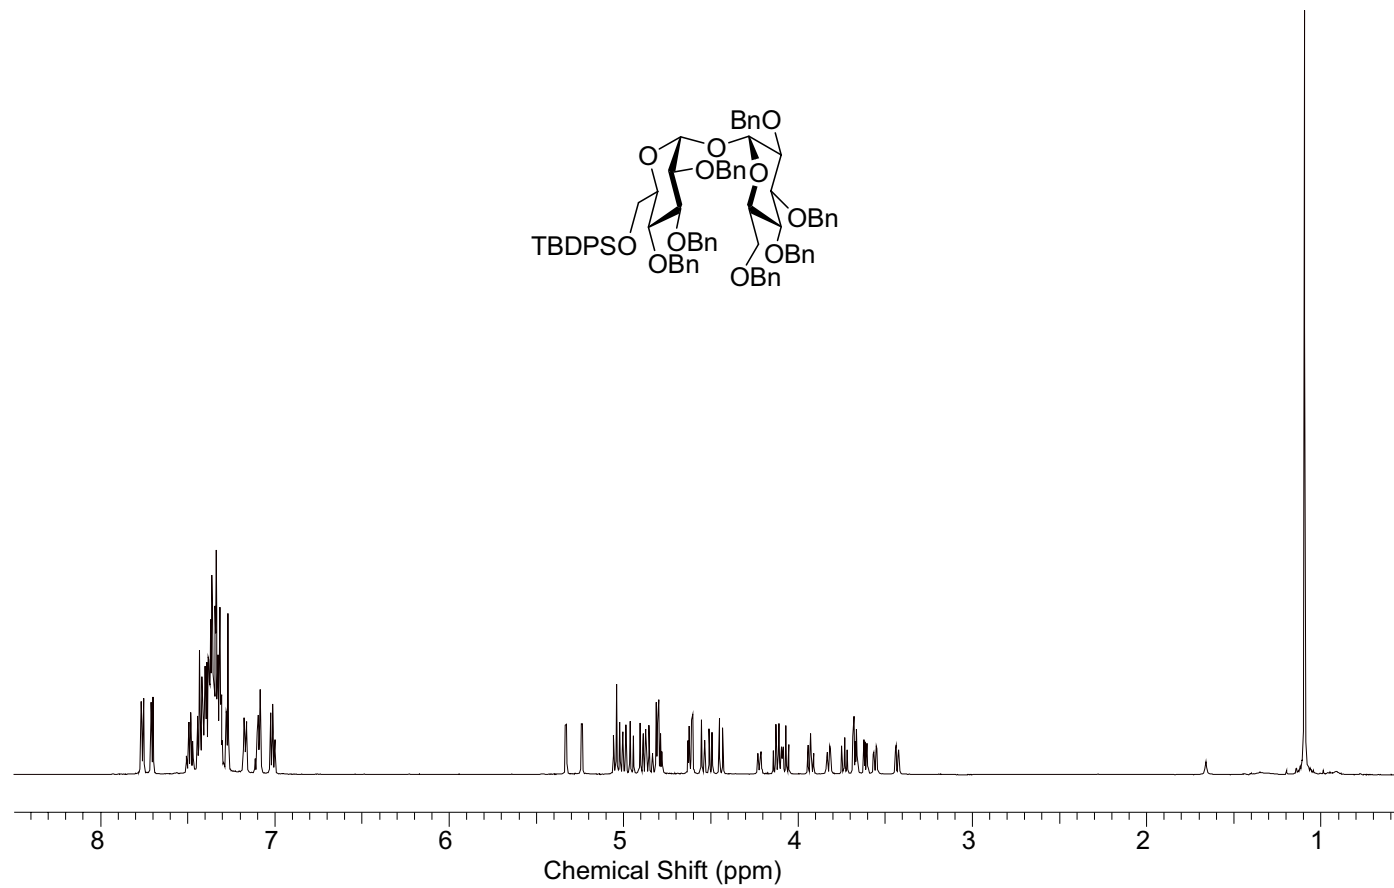

**$^{13}\text{C}$  NMR of 2,2',3,3',4,4',6'-hepta-*O*-benzyl-6,6'-di-*O*-*tert*-butyldiphenylsilyl- $\alpha$ -D-trehalose (20)**

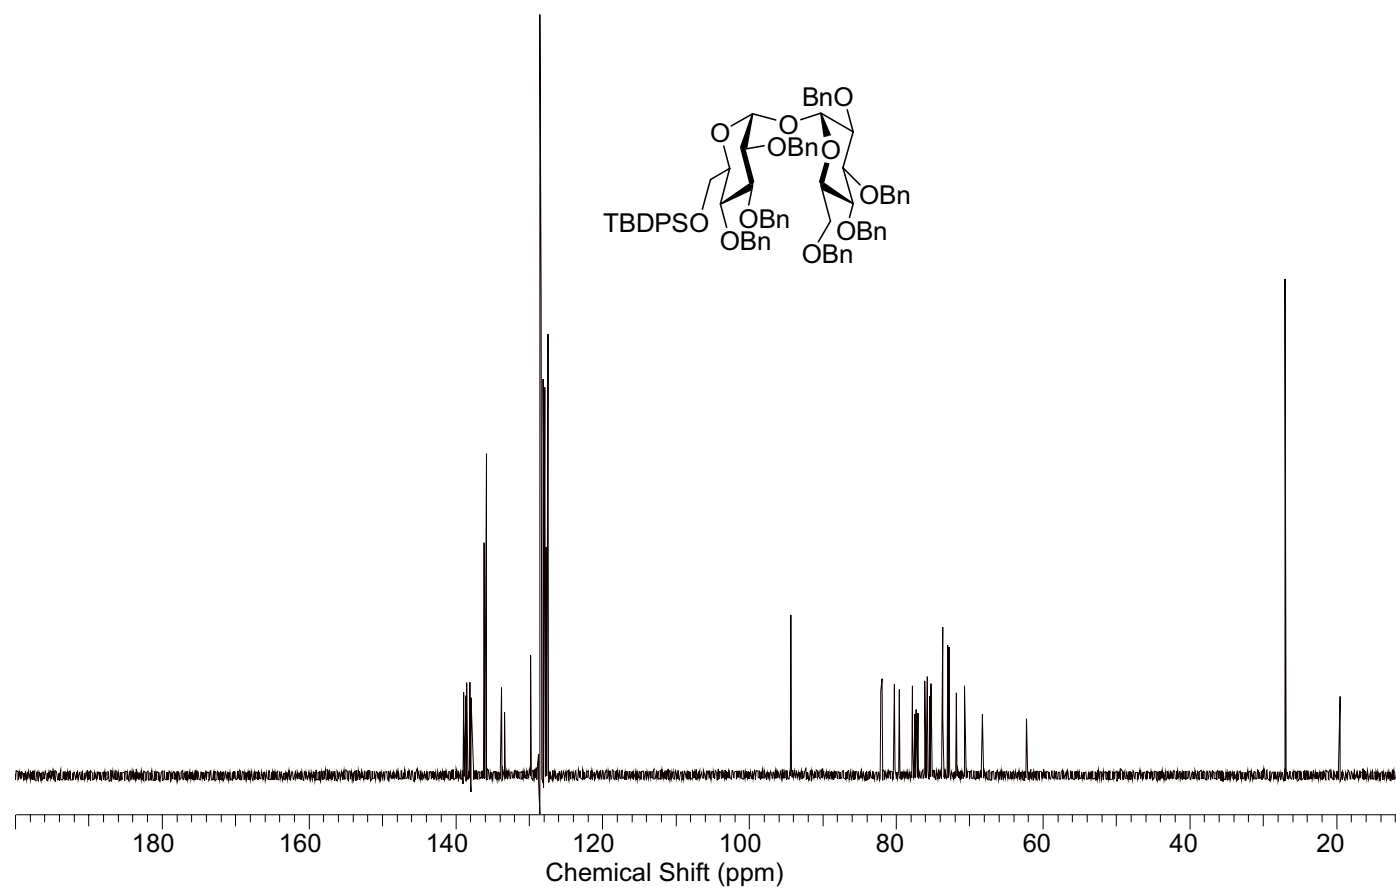

**<sup>1</sup>H NMR of 2,2',3,3',4,4'-hexa-*O*-benzyl-6,6'-di-*O*-*tert*-butyldiphenylsilyl- $\alpha$ -D-trehalose (21)**

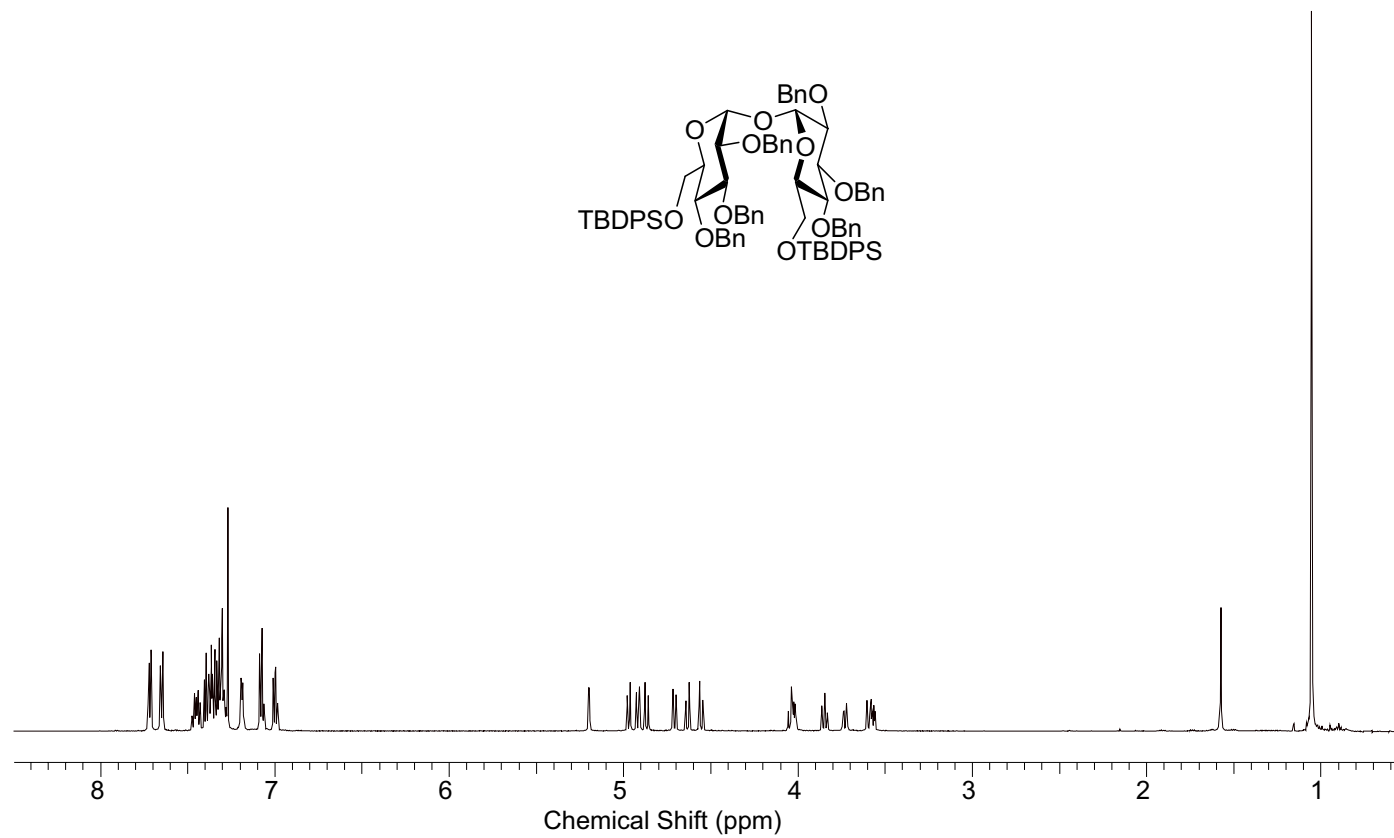

**$^{13}\text{C}$  NMR of 2,2',3,3',4,4'-hexa-*O*-benzyl-6,6'-di-*O*-*tert*-butyldiphenylsilyl- $\alpha$ -D-trehalose (21)**

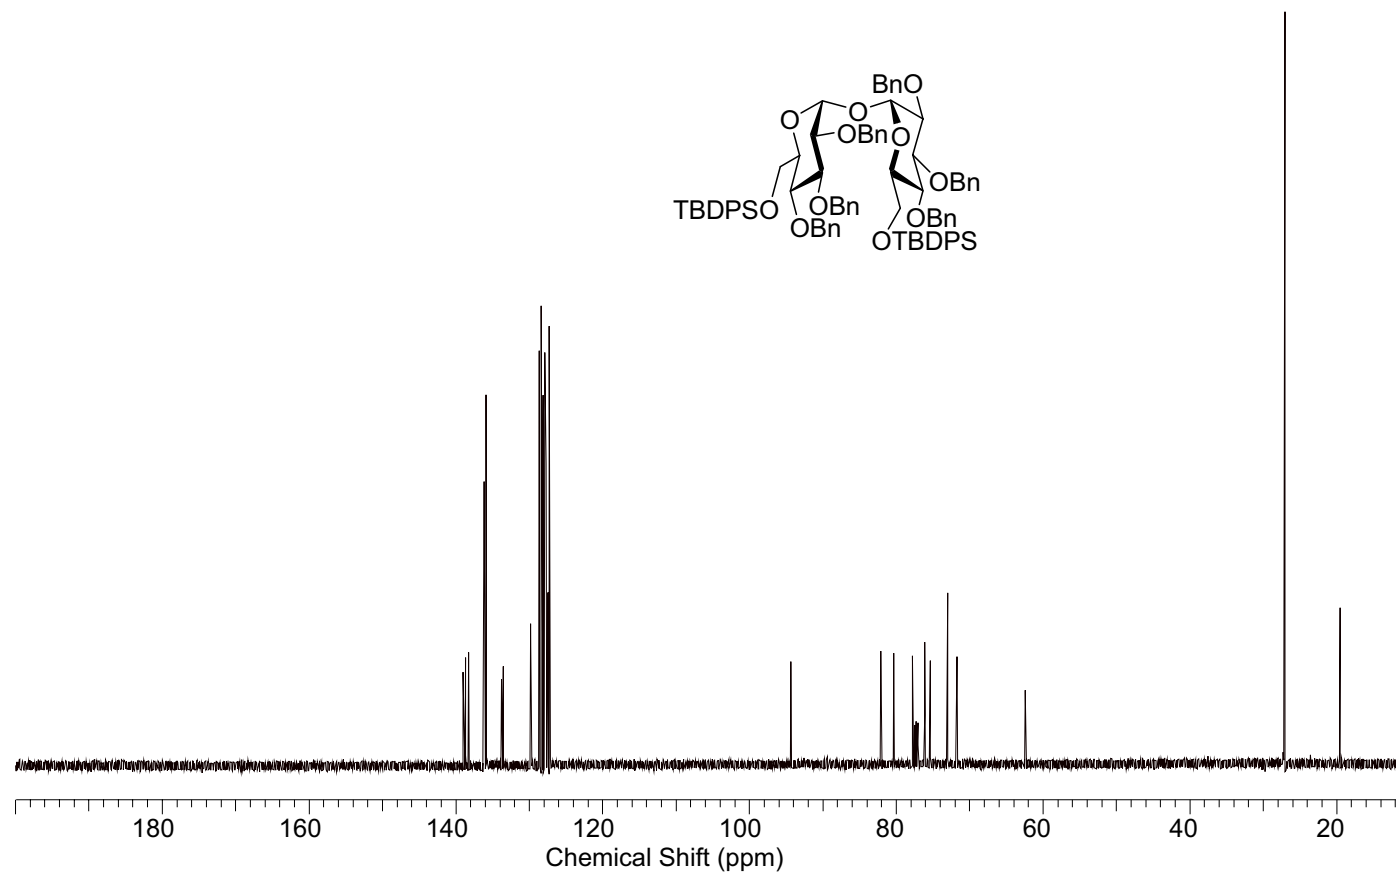



**$^{13}\text{C}$  NMR of bis(methyl- $\alpha$ -D-glucopyranosyluronate) ether (4)**

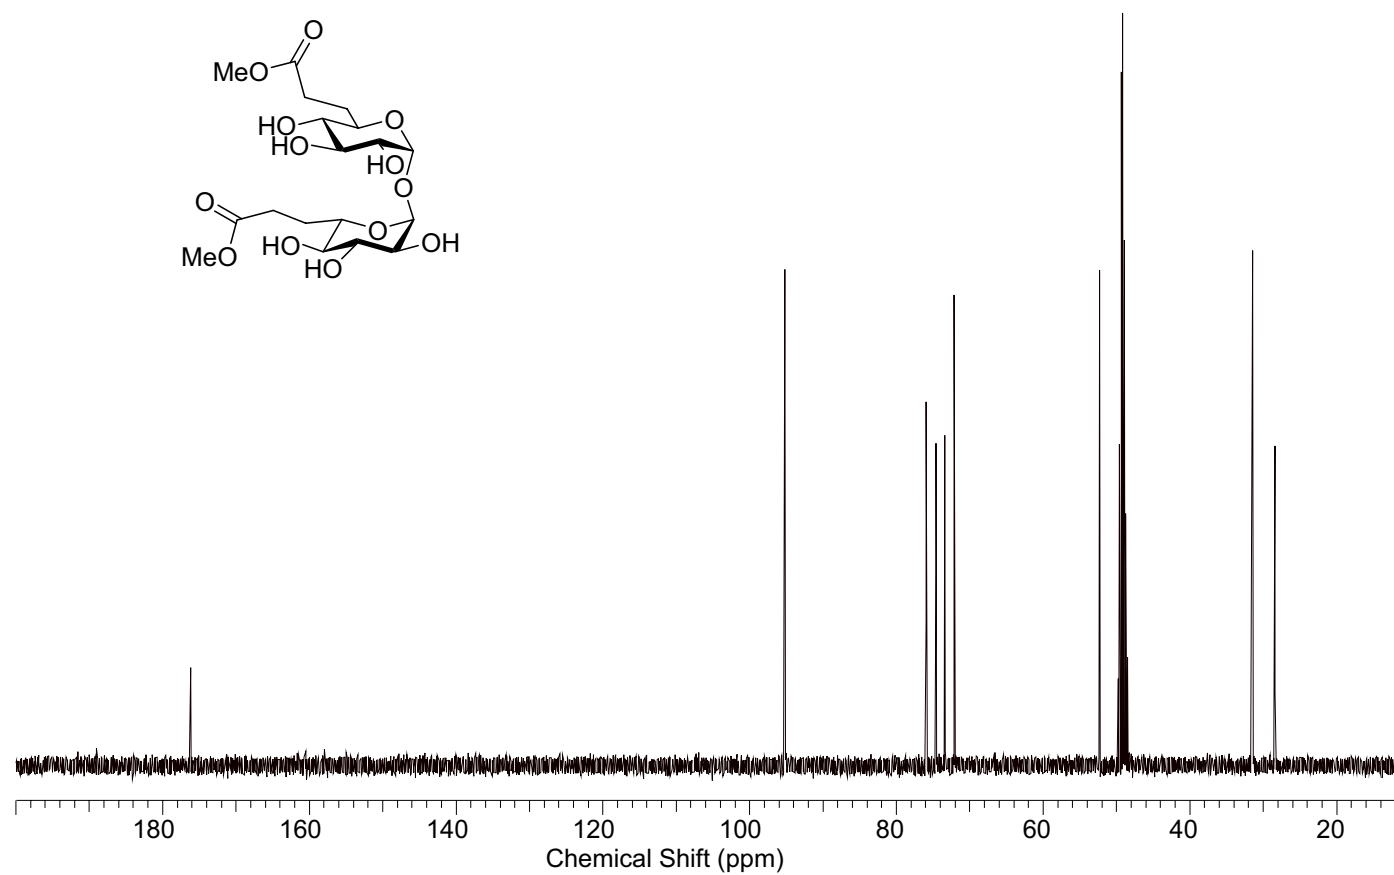

**<sup>1</sup>H NMR of bis(methyl-2,3,4-tri-*O*-benzyl- $\alpha$ -D-*gluco*-octopyranosyluronate) ether (24)**

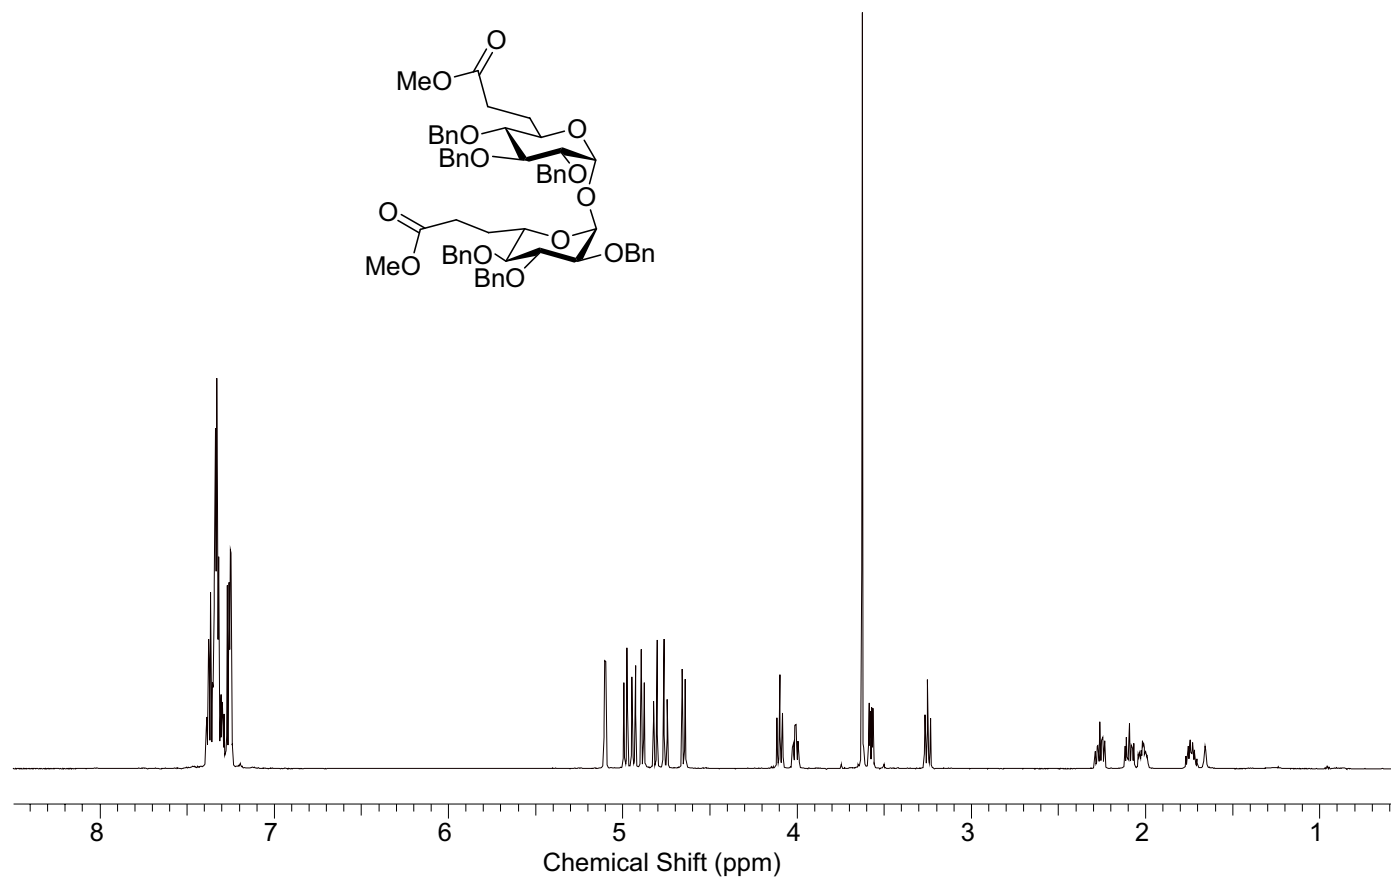

**$^{13}\text{C}$  NMR of bis(methyl-2,3,4-tri-*O*-benzyl- $\alpha$ -D-glucopyranosyluronate) ether (24)**

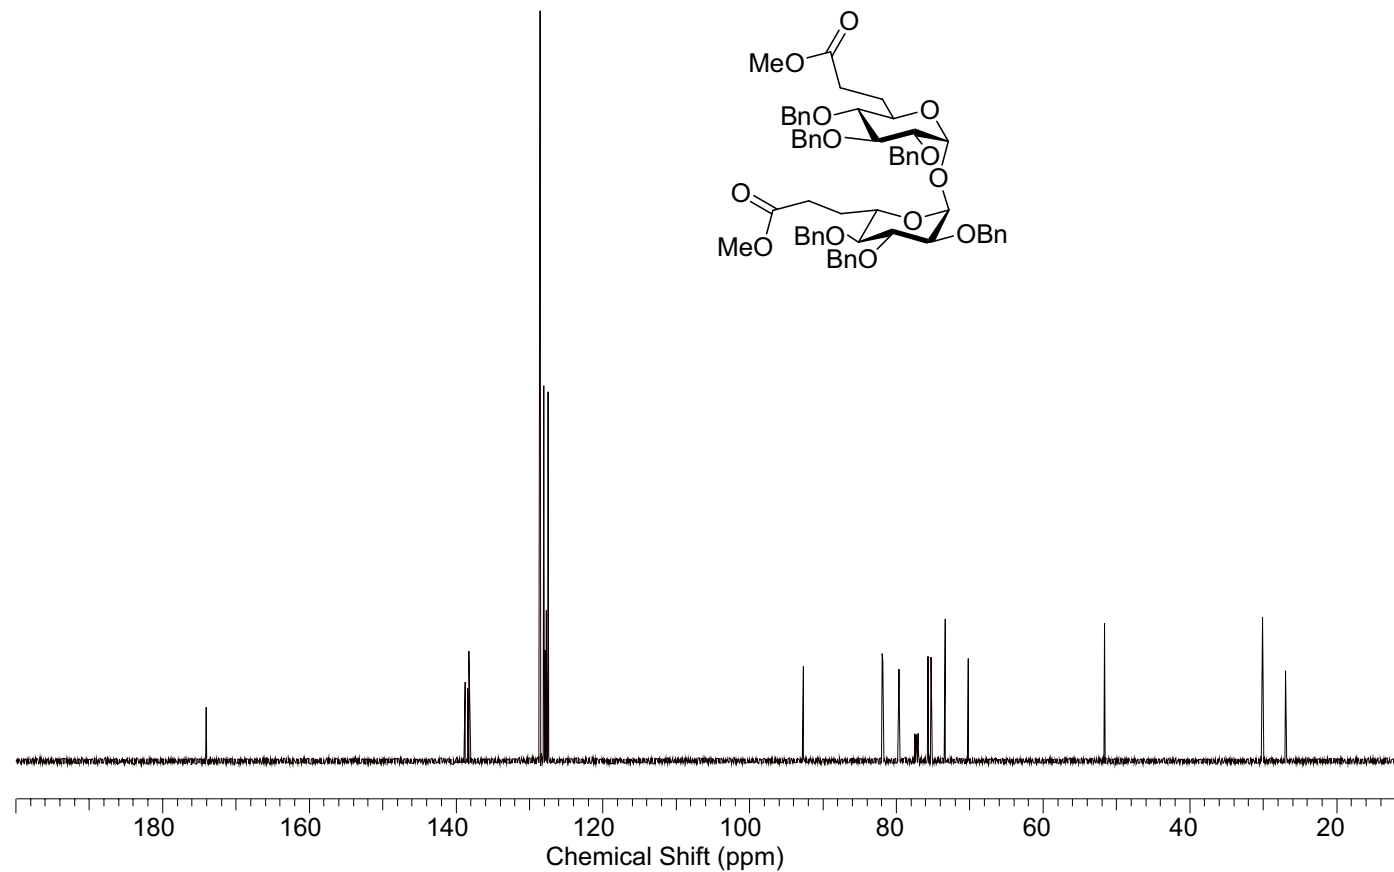

**<sup>1</sup>H NMR of bis(methyl-2,3,4-tri-*O*-benzyl- $\alpha$ -D-*gluco*-octopyranosyluronic acid) ether (25)**

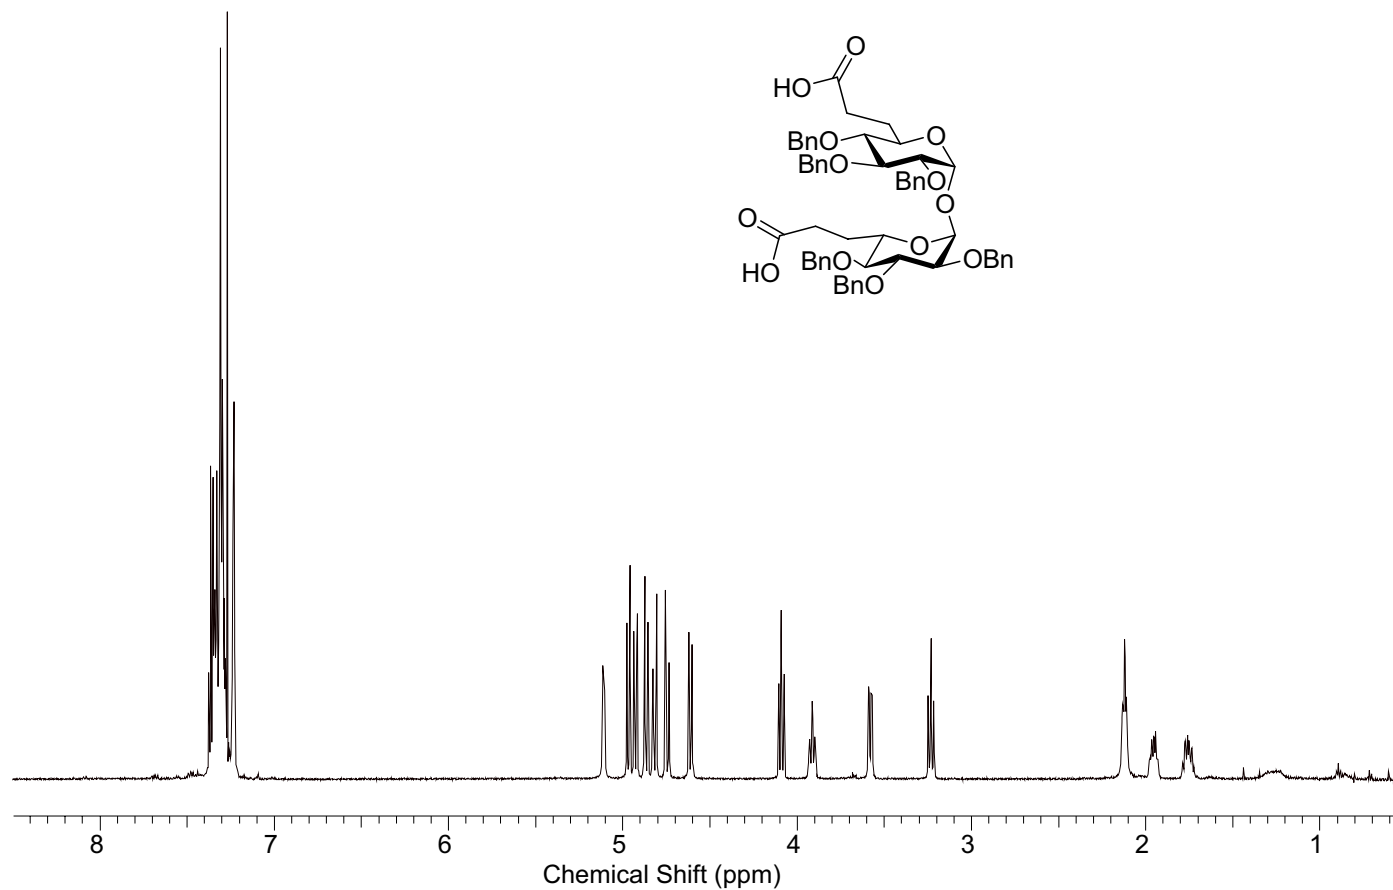

**$^{13}\text{C}$  NMR of bis(methyl-2,3,4-tri-*O*-benzyl- $\alpha$ -D-*gluco*-octopyranosyluronic acid) ether (25)**

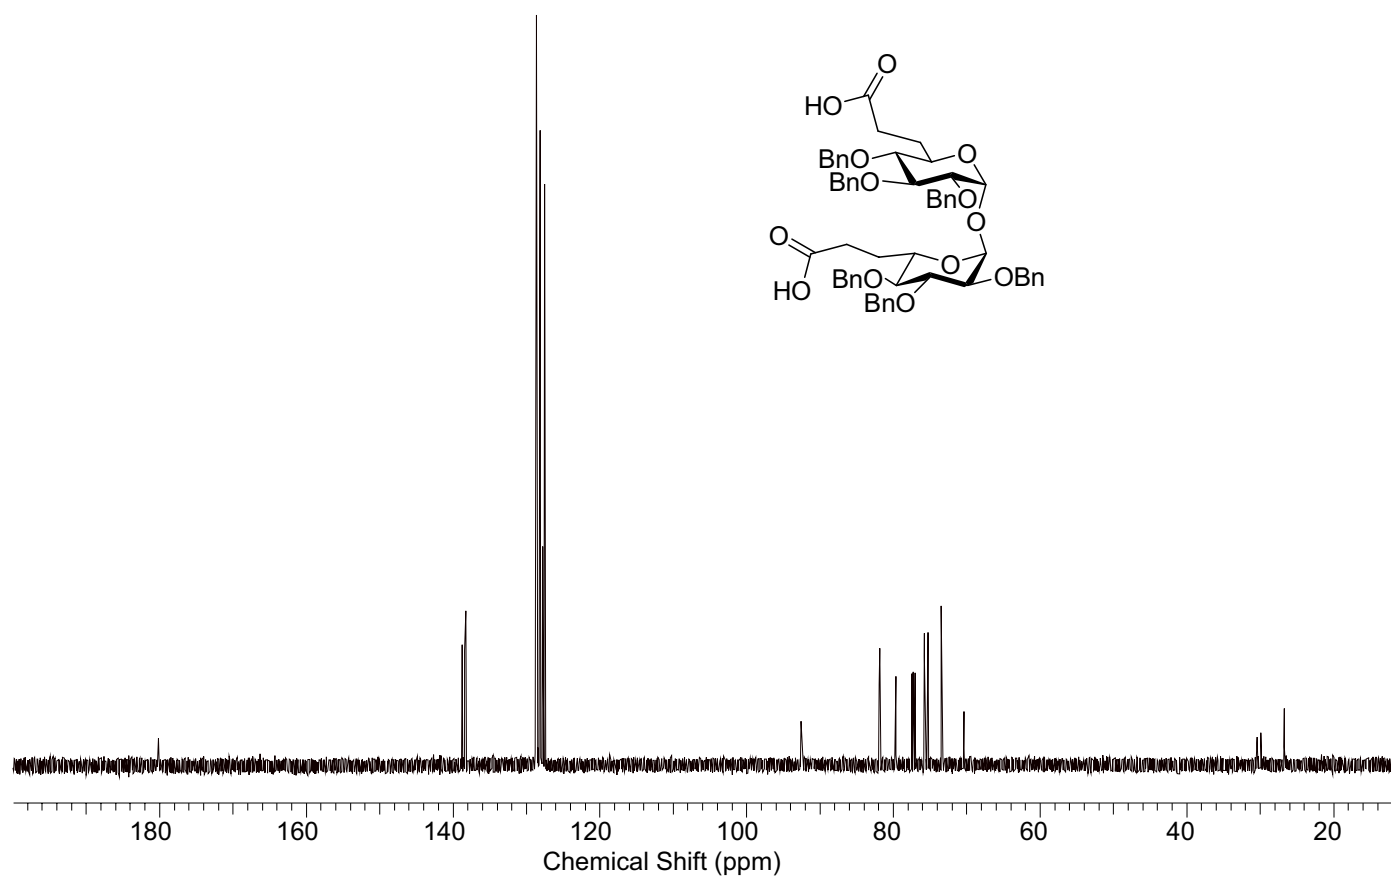

**<sup>1</sup>H NMR of bis(2,3,4-tri-*O*-benzyl-9-cyano-8-oxo-9-(triphenylphosphanylidene)- $\alpha$ -D-gluco-nonopyranosyluronitrile) ether  
(26)**

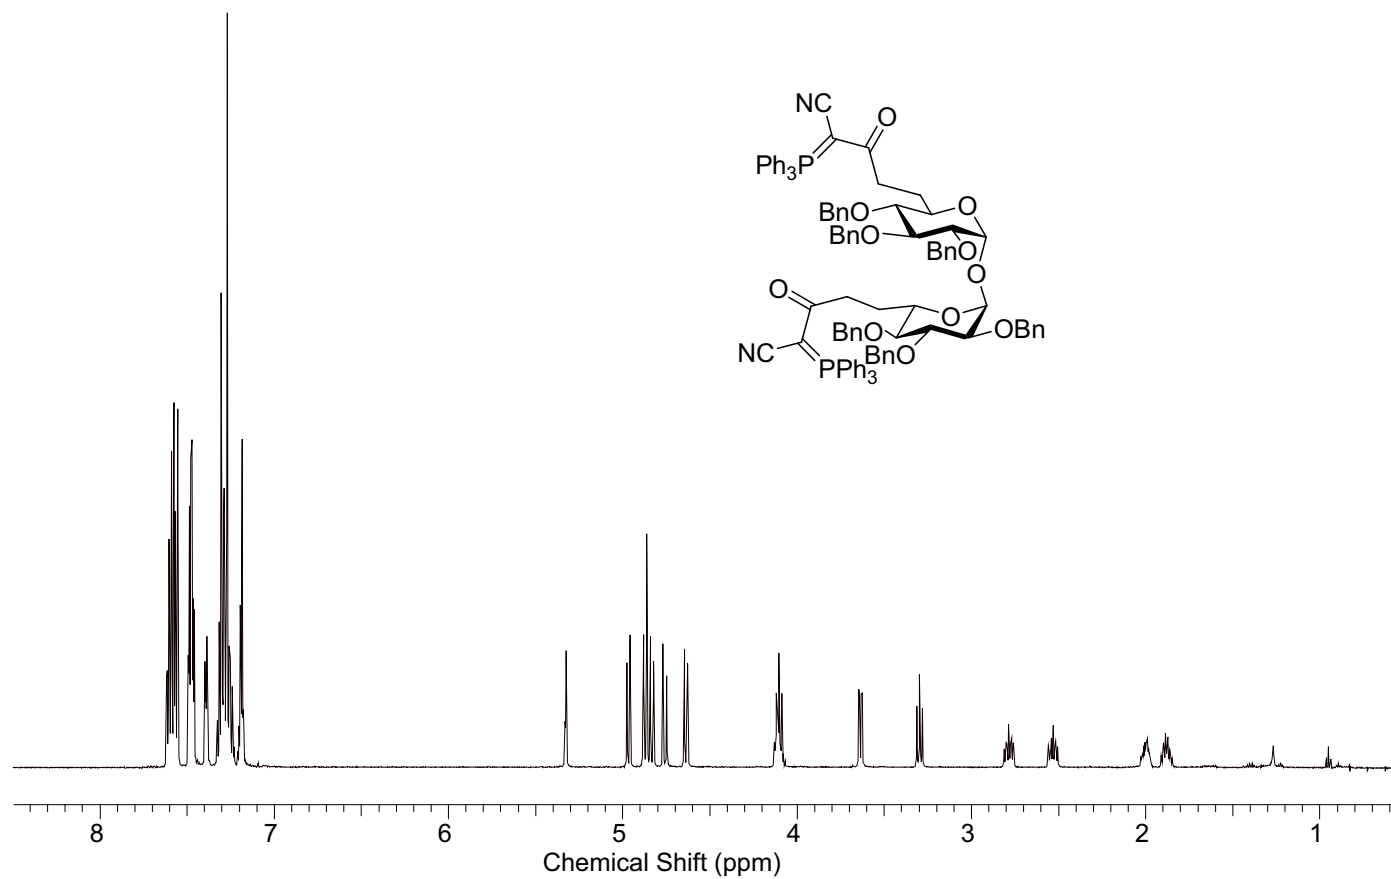

**$^{13}\text{C}$  NMR of bis(2,3,4-tri-*O*-benzyl-9-cyano-8-oxo-9-(triphenylphosphanylidene)- $\alpha$ -D-gluco-nonopyranosyluronitrile) ether  
(26)**

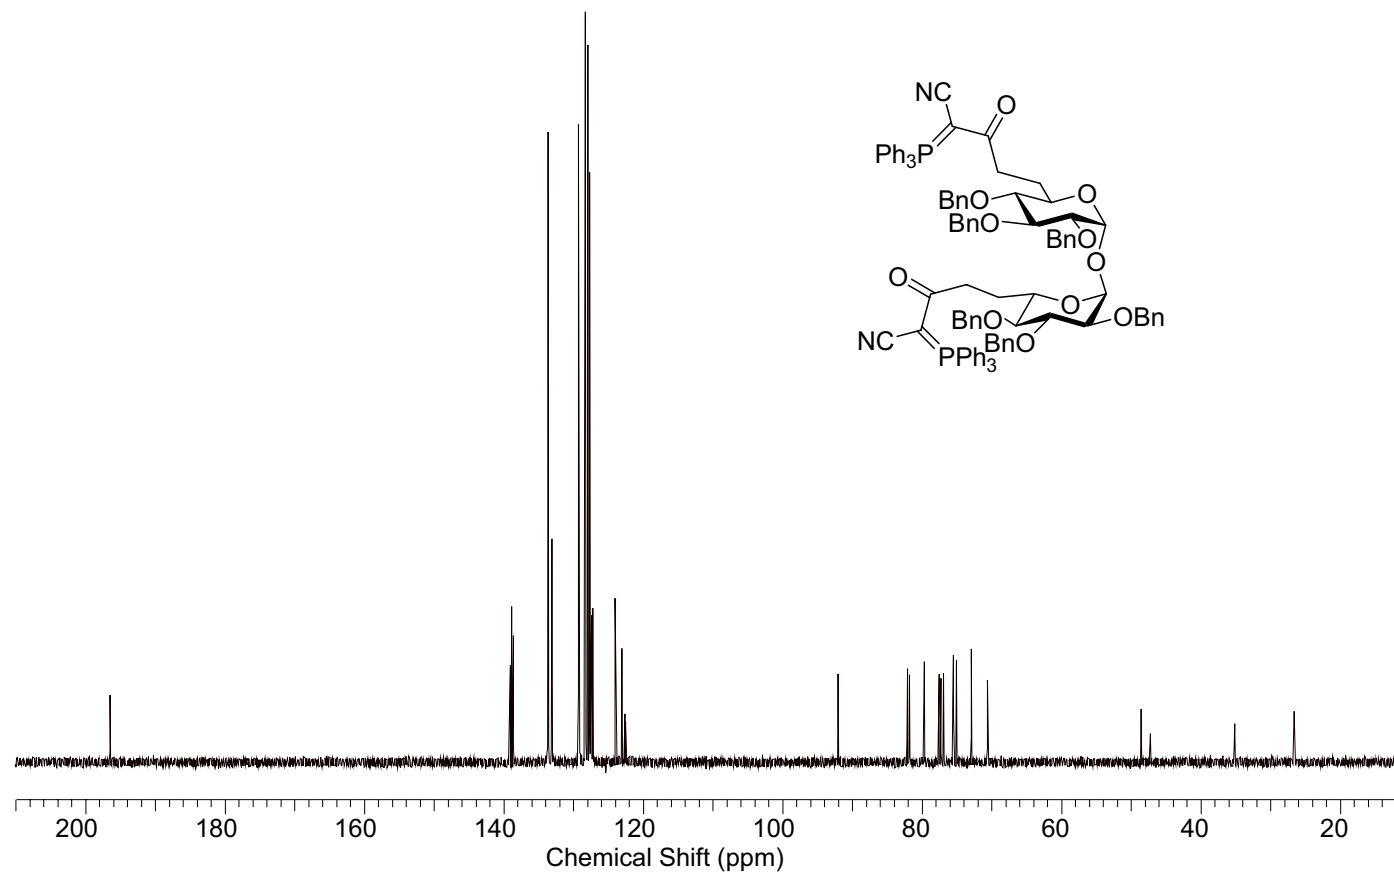

**<sup>31</sup>P NMR of bis(2,3,4-tri-*O*-benzyl-9-cyano-8-oxo-9-(triphenylphosphanylidene)- $\alpha$ -D-*gluco*-nonopyranosylurononitrile) ether  
(26)**

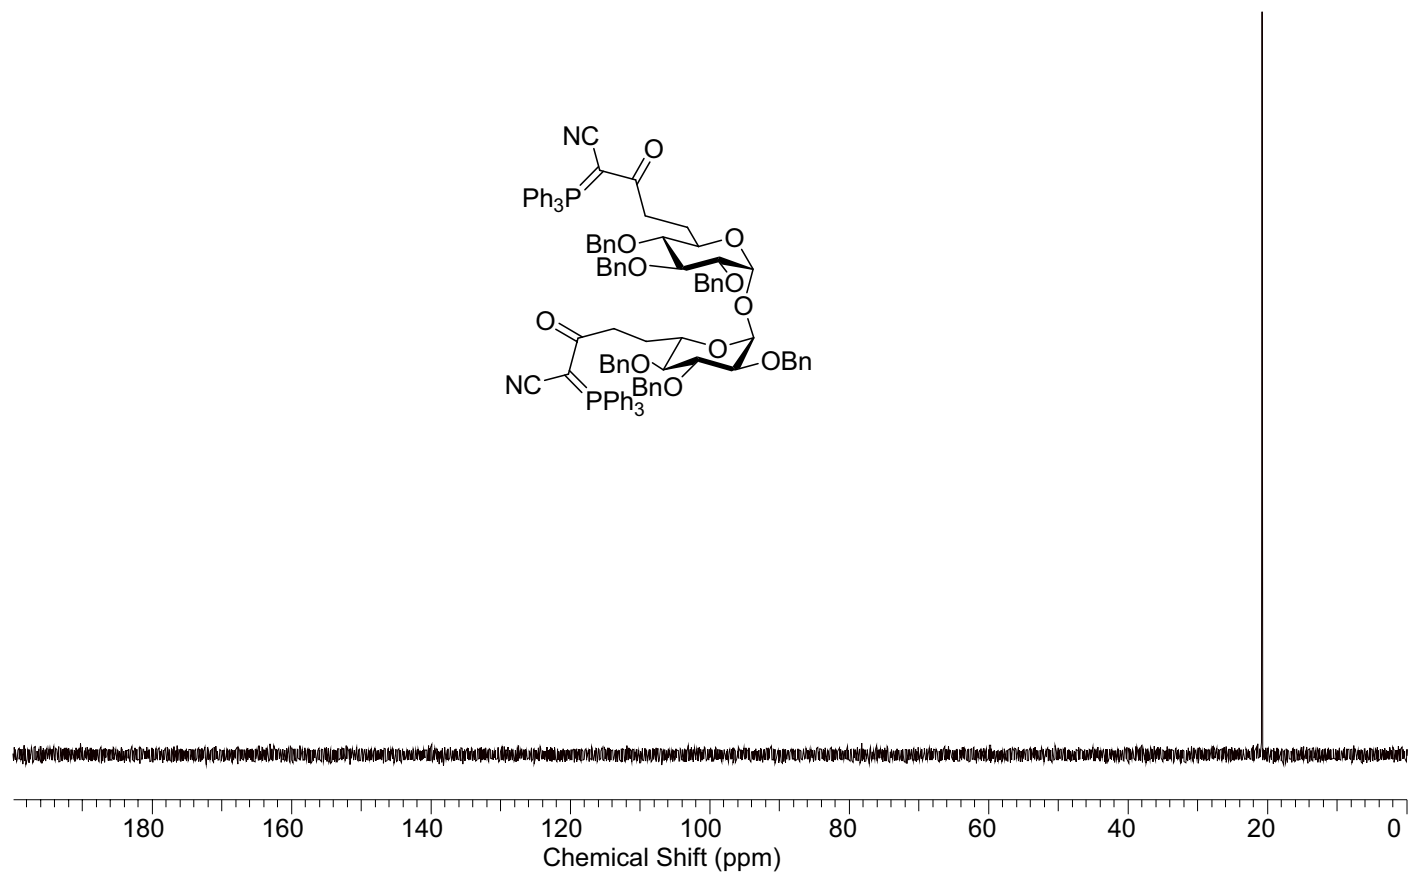

**<sup>1</sup>H NMR of bis(methyl-2,3,4-tri-*O*-benzyl-8-oxo- $\alpha$ -D-glucopyranosyluronate) ether (27)**

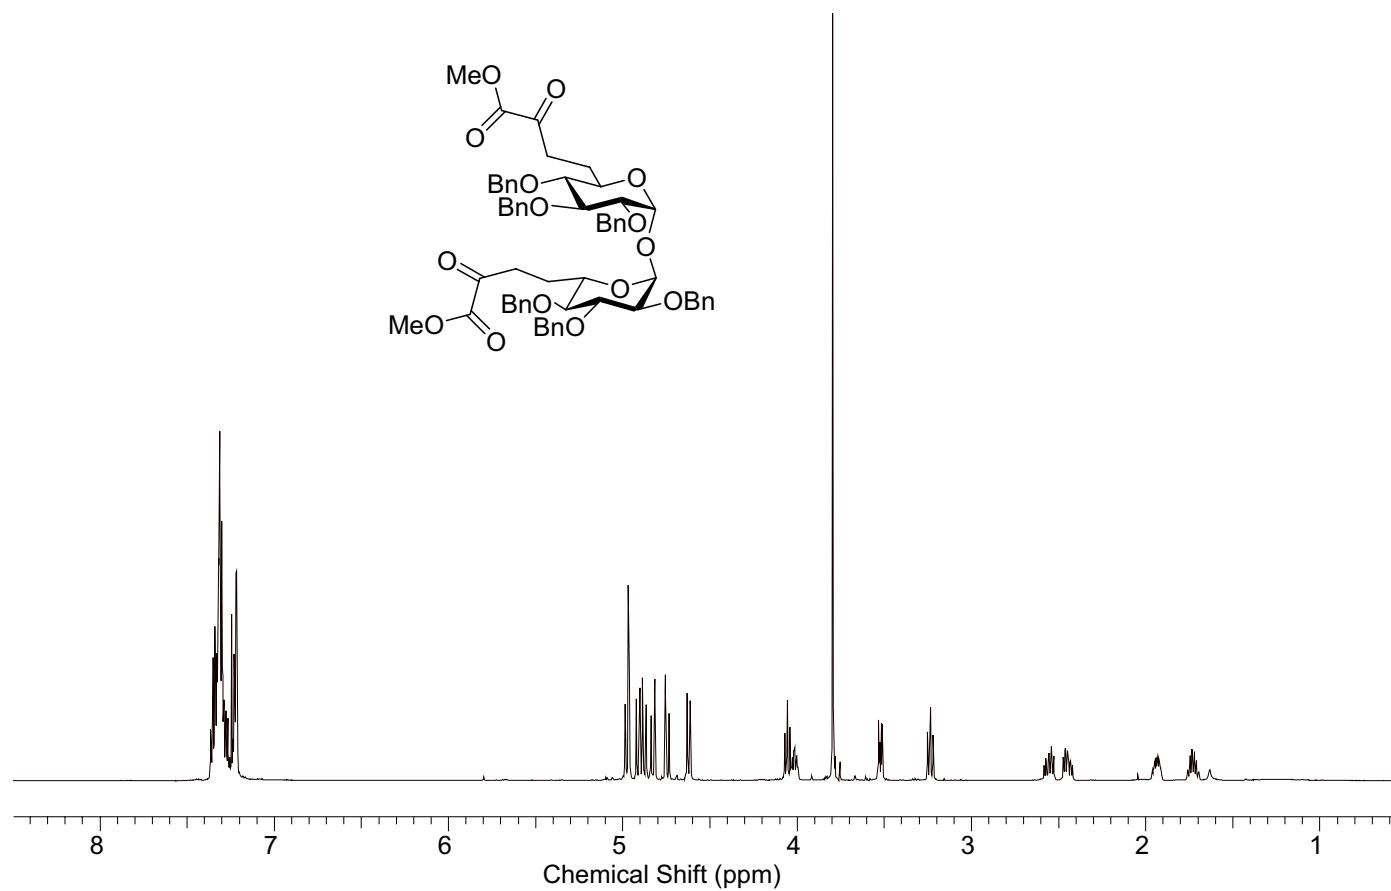

**<sup>13</sup>C NMR of bis(methyl-2,3,4-tri-*O*-benzyl-8-oxo- $\alpha$ -D-*gluco*-nonopyranosyluronate) ether (27)**

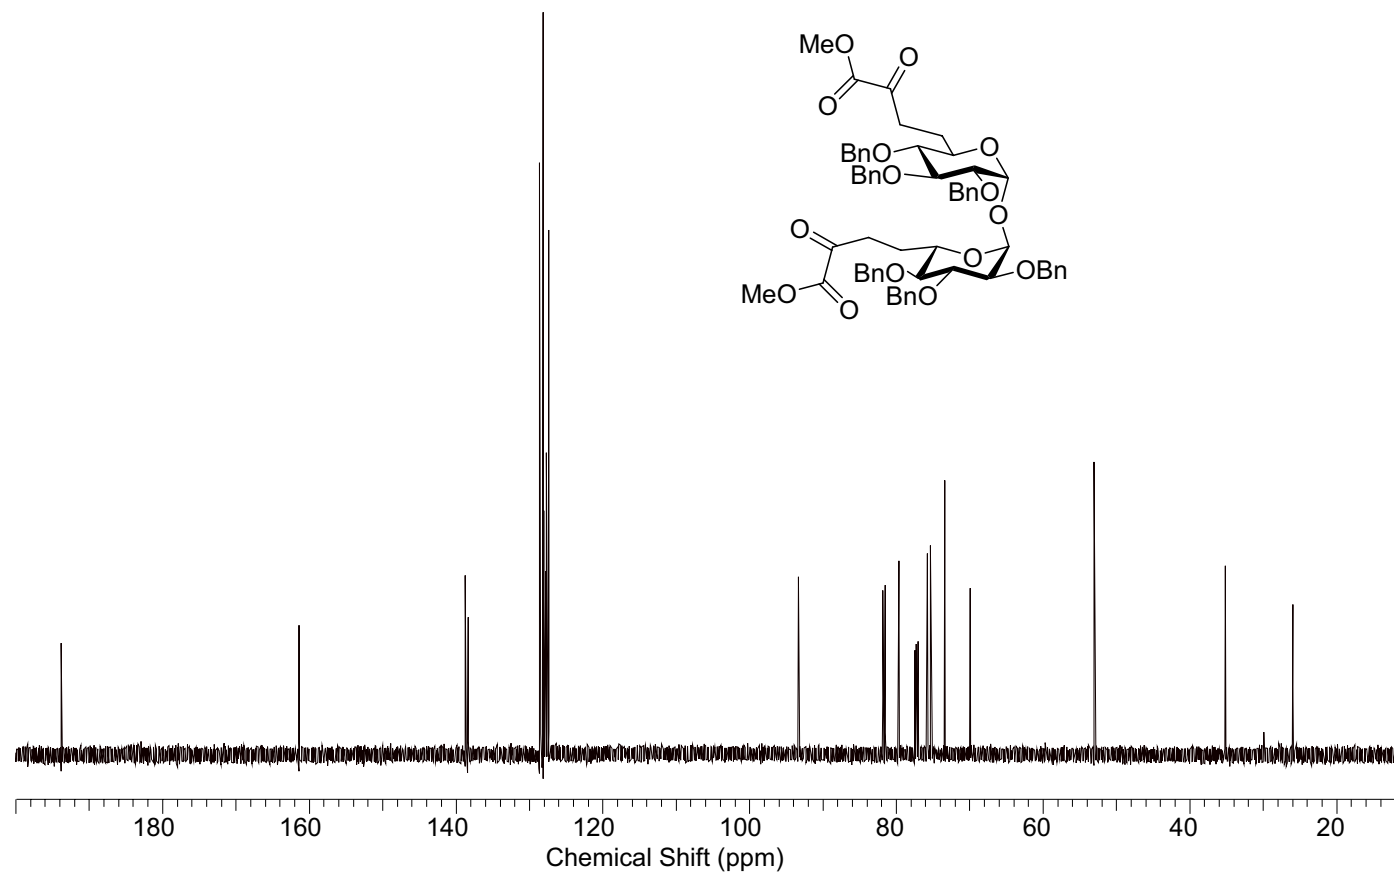

**$^1\text{H}$  NMR of bis(*N*-butyl-2,3,4-tri-*O*-benzyl-8-oxo- $\alpha$ -*D*-gluco-nonapyranosyluronamide) ether (28)**

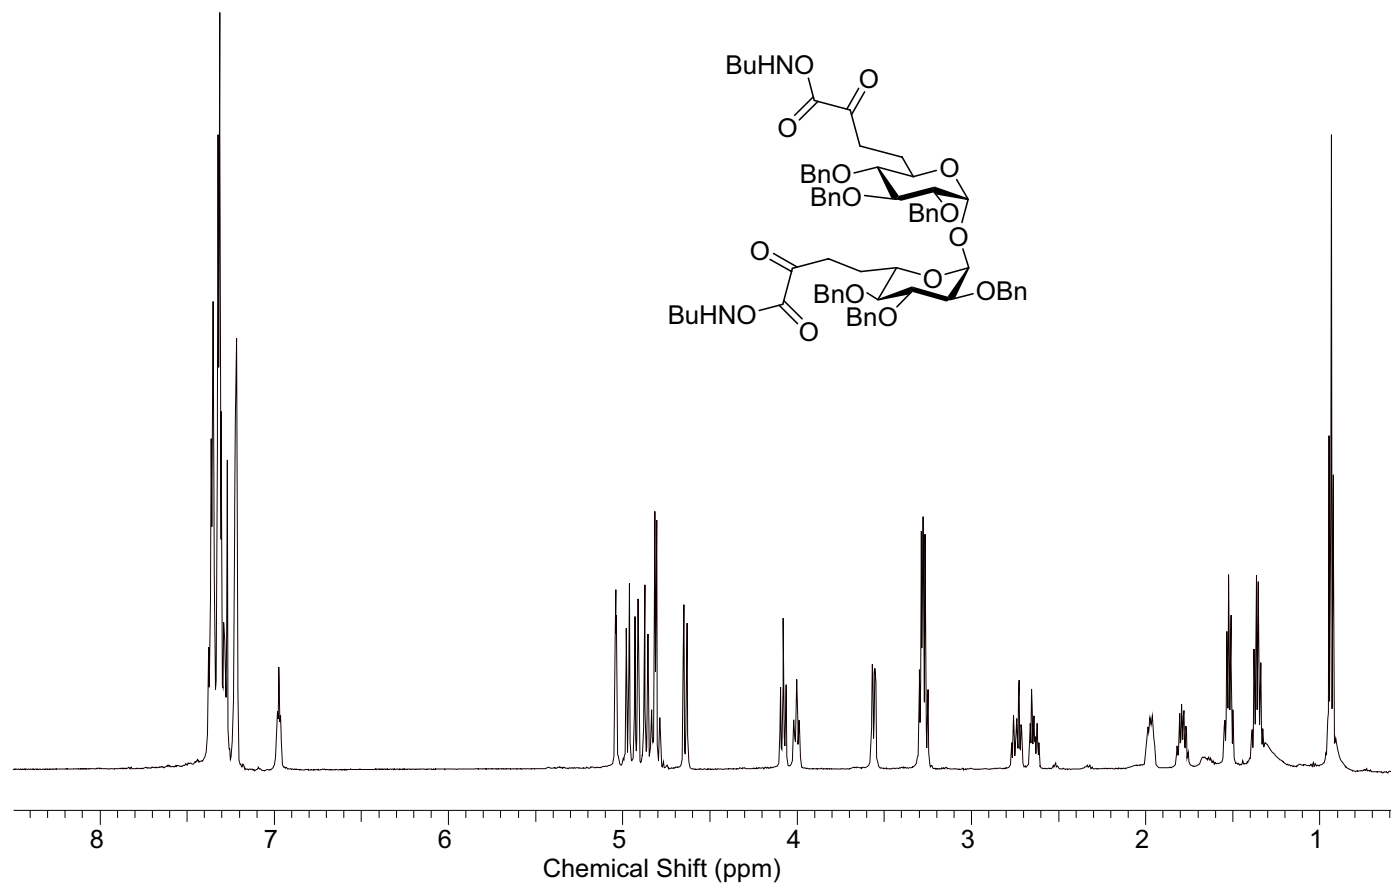

**$^{13}\text{C}$  NMR of bis(*N*-butyl-2,3,4-tri-*O*-benzyl-8-oxo- $\alpha$ -D-glucopyranosyluronamide) ether (28)**

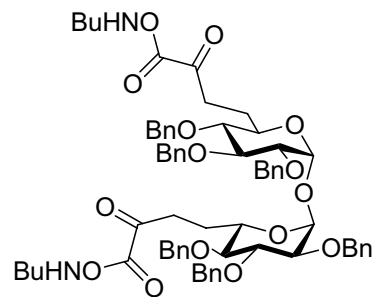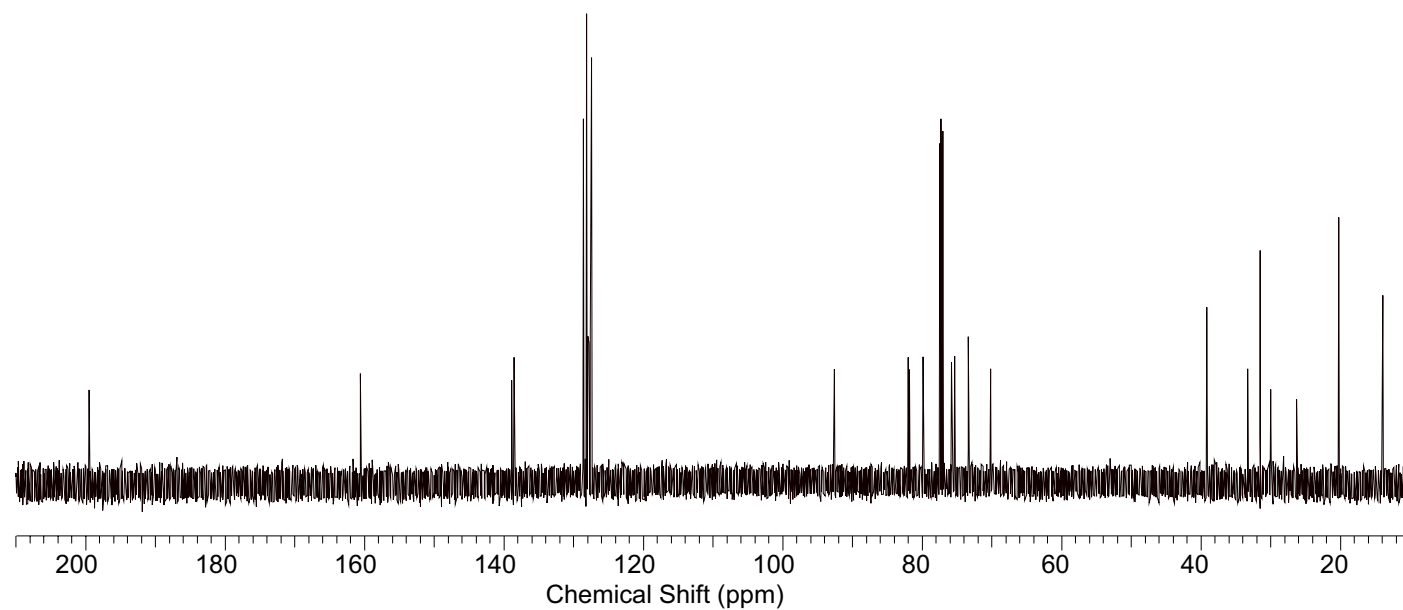

### <sup>1</sup>H NMR of trehalose-derived bicyclo-methyl ester (29)

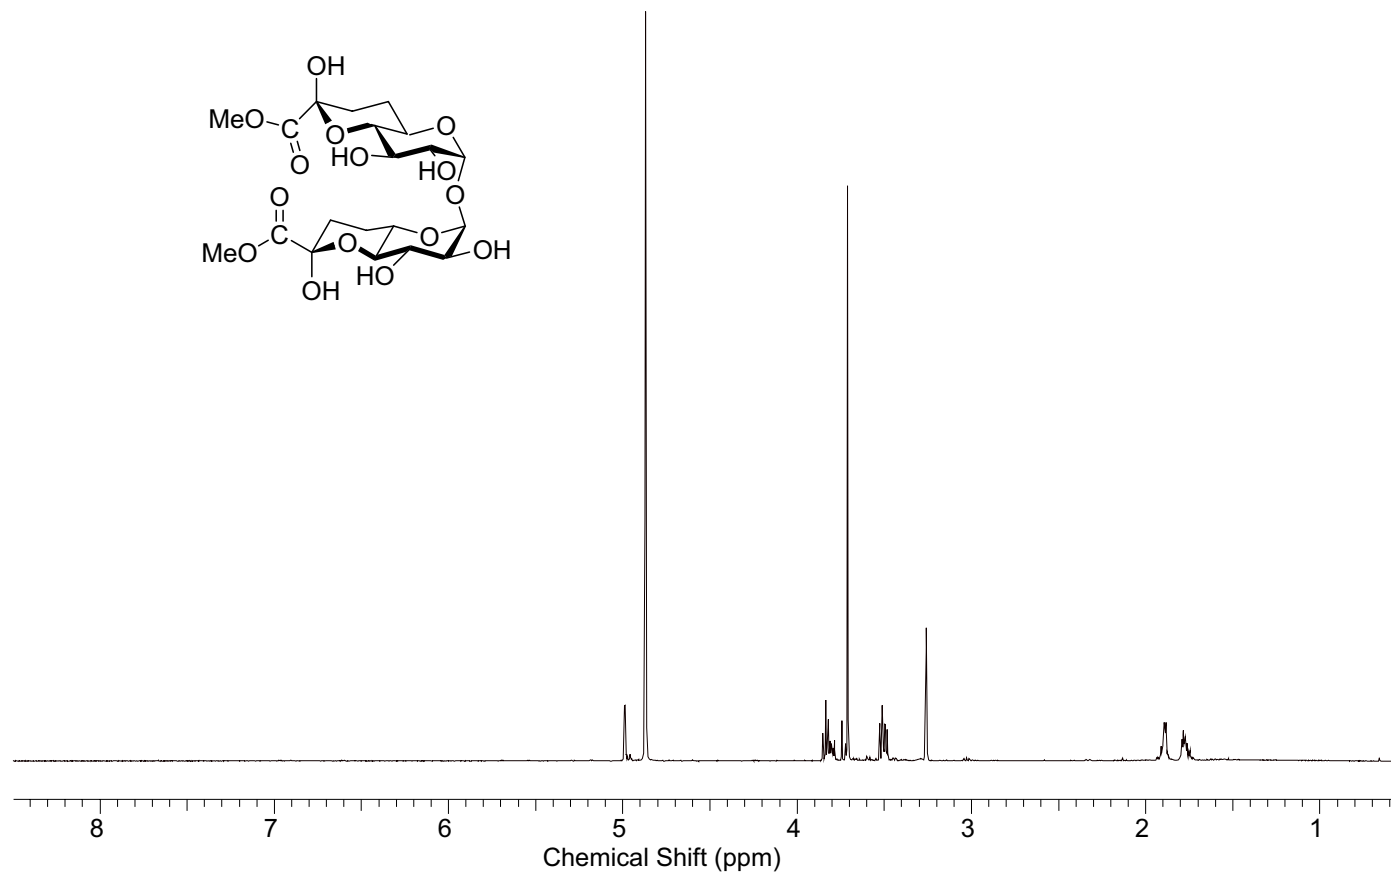

### $^{13}\text{C}$ NMR of trehalose-derived bicyclo-methyl ester (29)

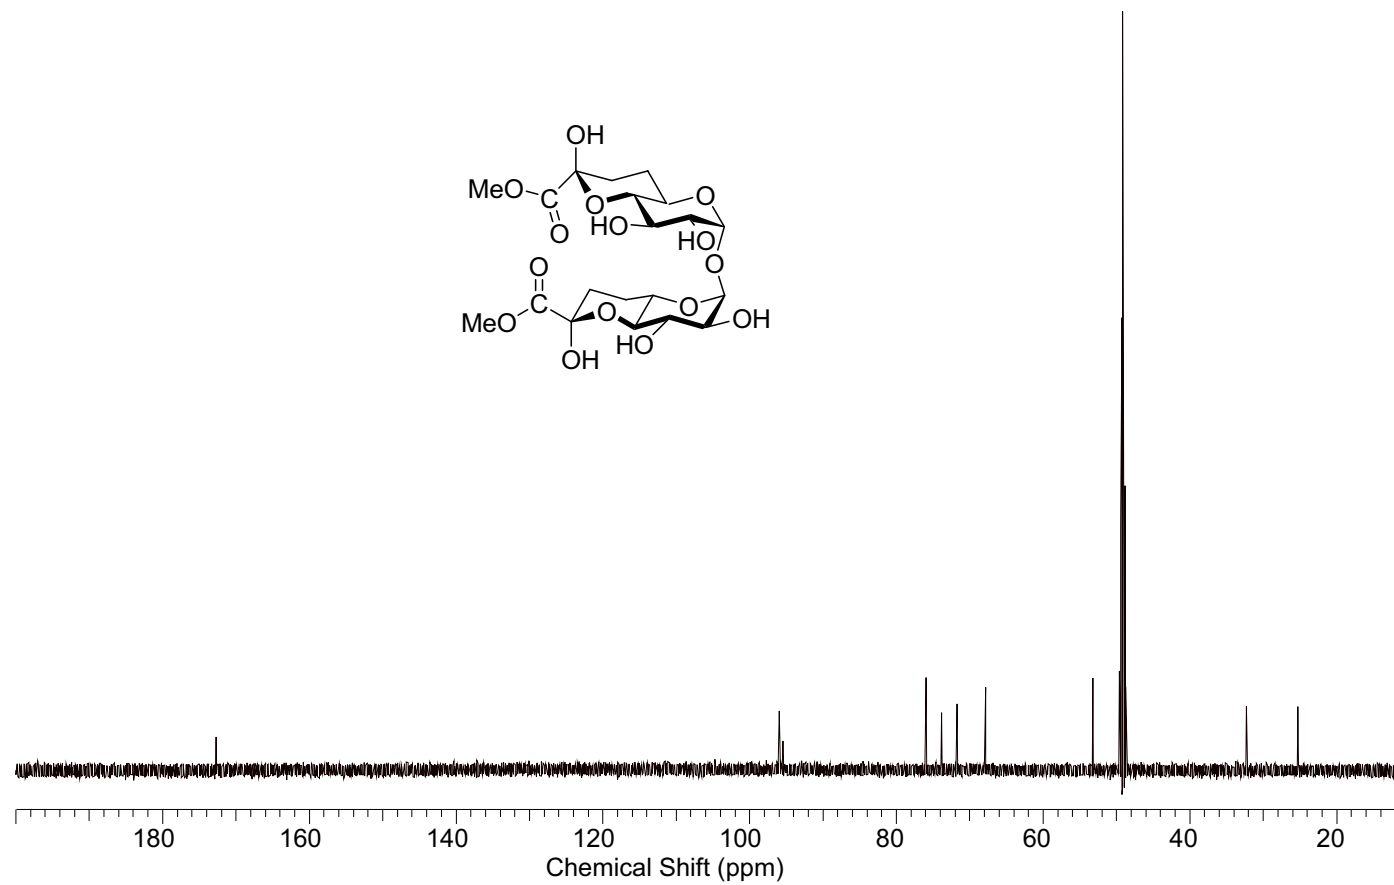

**<sup>1</sup>H NMR of trehalose-derived bicyclo-*N*-butylamide (30)**

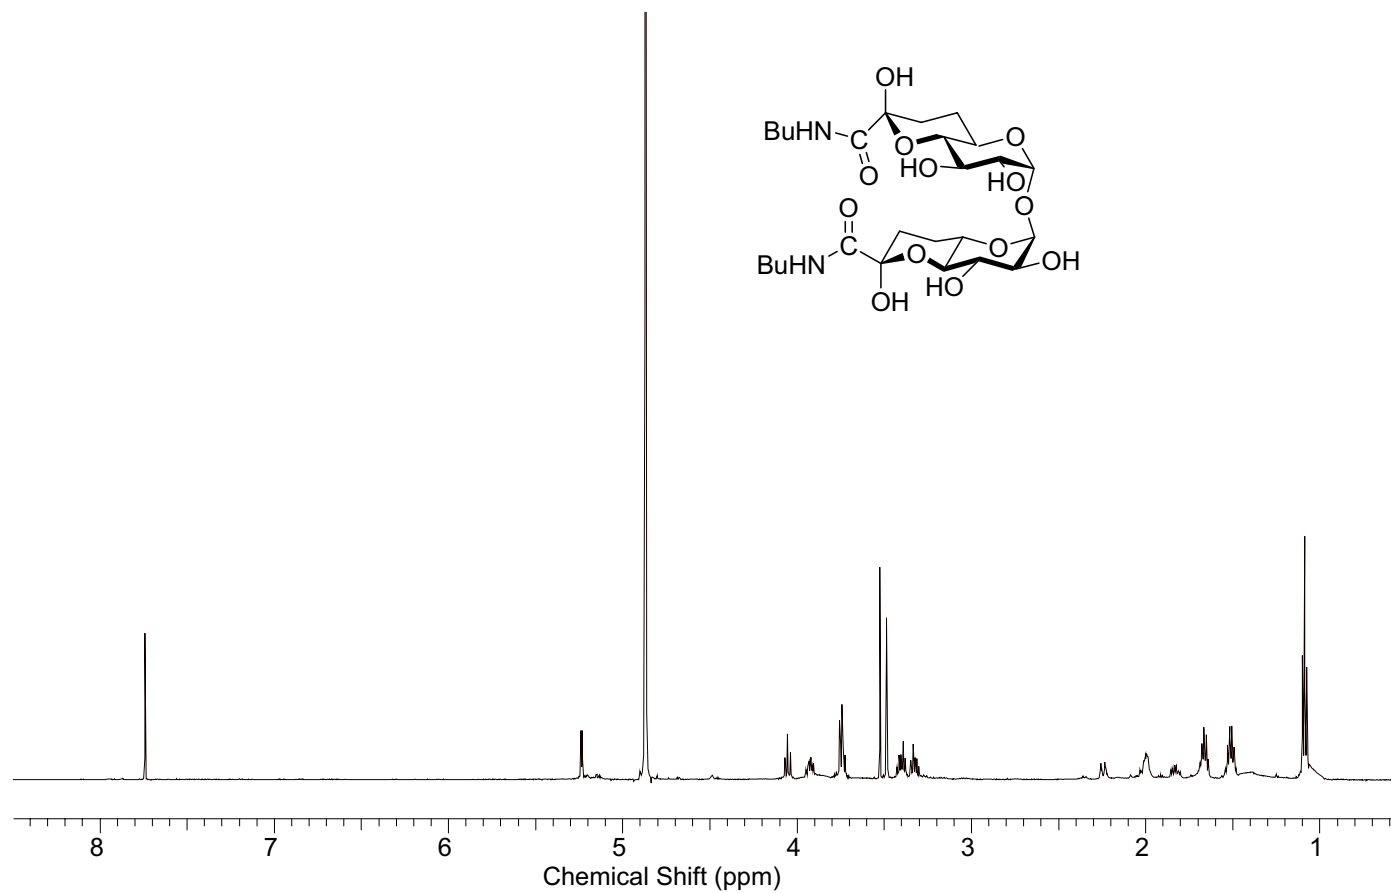

### $^{13}\text{C}$ NMR of trehalose-derived bicyclo-*N*-butylamide (30)

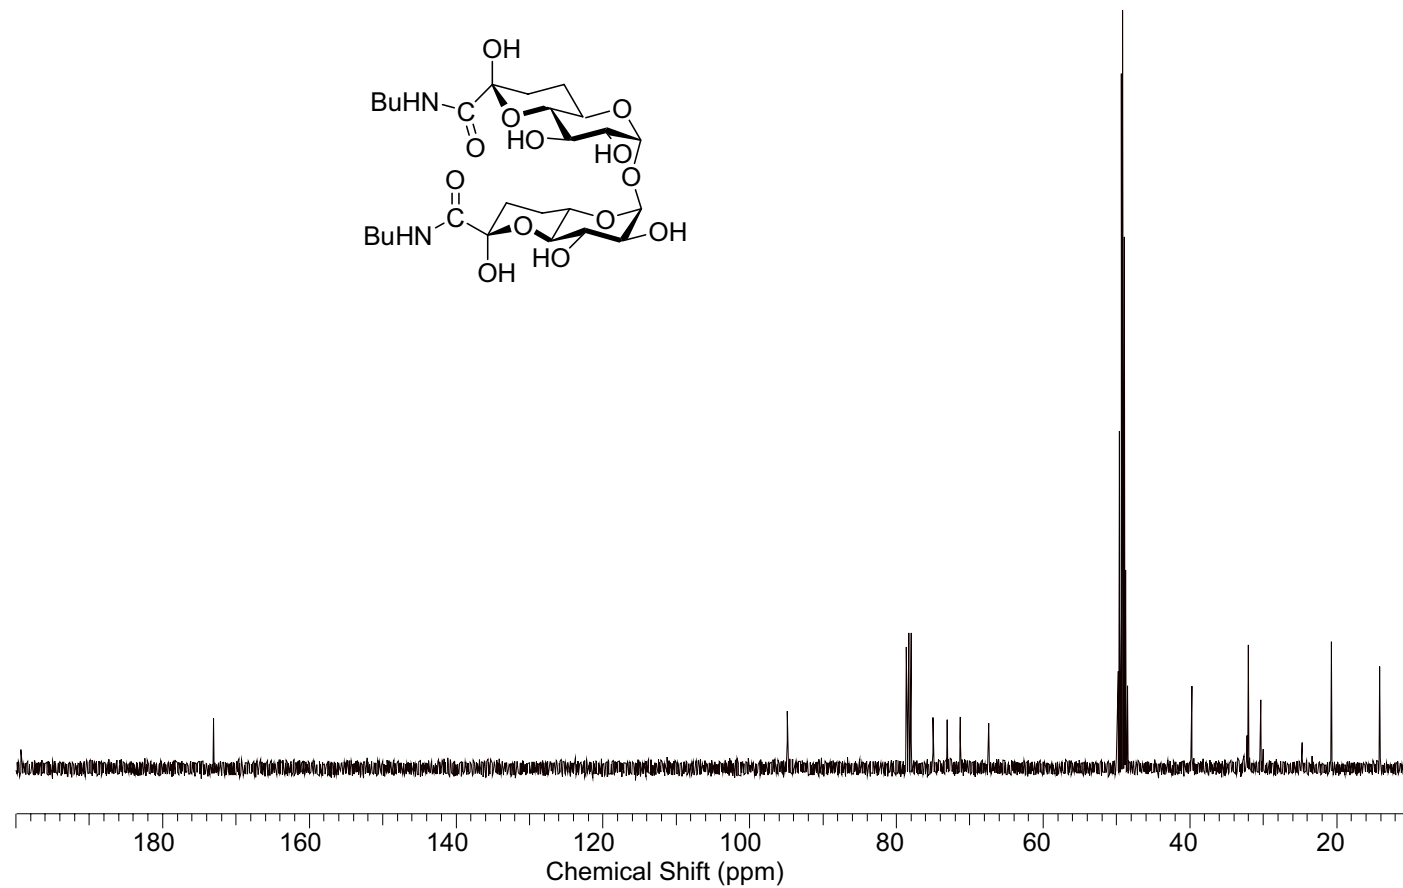

Supplement: b902284h.pdf [file b902284h.pdf]
